# Supplementary material for: Associations between knowledge of multilingual support resources and attitudes towards, and use of, ad hoc interpreters in pharmacies in Aichi Prefecture, Japan
Source: Research Square preprint supplement (doi:10.21203/rs.3.rs-7097925/v1), 2025-08-22
Supplement: Supplementary file 1 [file 1e5f9f50cc35edf1df4707e0.xlsx]

## Sheet: Sheet1
Table3 Factors associated with positive attitudes towards ad hoc interpreters (N=511)
	CORa)	95% CIb)	p-value	AORc)	95% CI	p-value
Number of knowledge of multilingual support resources
0		Ref.		Ref.
1	0.51	0.12-2.27	0.38	0.7	0.14-3.50	0.67
2	0.44	0.10-1.95	0.28	0.59	0.12-2.93	0.52
>=3	0.65	0.11-3.85	0.64	1.18	0.17-8.10	0.86
Geographic location
Municiparties		Ref.		Ref.
Foreign concentrated city of top 5	2.03	0.82-5.04	<0.001	2.57	0.99-6.68	0.05
Capital city	0.45	0.26-0.78	<0.001	0.5	0.28-0.91	0.02
The highest level of English proficiency of pharmacists
None		Ref.		Ref.
Basic	0.1	0.01-0.76	0.03	0.13	0.02-1.02	0.05
Possible	0.03	0.003-0.26	<0.001	0.044	0.005-0.37	0.004
Number of foreign ptients per year
1-10		Ref.			Ref.
11-50	1.1	0.53-2.29	<0.001	1.09	0.50-2.39	0.82
>=51	0.53	0.26-1.05	<0.001	0.44	0.20-0.96	0.04
“How often are foreign patients accompanied by someone ?”
Rarely		Ref.		Ref.
Sometimes	1.07	0.54-2.14	0.85	1.06	0.49-2.30	0.88
Mostly	3.11	1.52-6.36	0.002	2.78	1.26-6.11	0.01
a ) COR=Clude Odds Ratio, b) CL=Cofidence Interval, c) AOR=Adjusted Odds Ratio
