# Supplementary material for: Associations between knowledge of multilingual support resources and attitudes towards, and use of, ad hoc interpreters in pharmacies in Aichi Prefecture, Japan
Source: Research Square preprint supplement (doi:10.21203/rs.3.rs-7097925/v1), 2025-08-22
Supplement: Supplementary file 2 [file 5485e373c451bed9b21e1158.xlsx]

## Sheet: Sheet1
Table 1. Characteristics of pharmacies (N=606)
	n	%
Geographic location
Capital city	187	30.9
Foreign concentrated city of top 5	111	18.3
Municiparties	308	50.8
Number of pharmacies belonging to the same cooperation
1	146	24.1
2-5	164	27.1
6-20	92	15.2
21-100	68	11.2
101-500	50	8.3
501-1000	31	5.1
>=1001	46	7.6
Don't know	9	1.5
Number of prescriptions per month
<=500	76	12.5
501-1000	149	24.6
1001-1500	172	28.4
1501-2000	104	17.2
>=2001	101	16.7
Don't know	4	0.7
Ever receiving foreign patients
Yes	511	84.3
No	95	15.7
