# Supplementary material for: Associations between knowledge of multilingual support resources and attitudes towards, and use of, ad hoc interpreters in pharmacies in Aichi Prefecture, Japan
Source: Research Square preprint supplement (doi:10.21203/rs.3.rs-7097925/v1), 2025-08-22
Supplement: Supplementary file 3 [file aa335761dff6d2649d24f2b1.xlsx]

## Sheet: Sheet1
Table 2 Characteristics of pharmacies that had received at least one foreign patient (N=511)
	n	%
Knowledge of multilingual support resources (multiple answer)
Multiingual translation devices or apps	464	90.8
Written translated materials	247	48.3
"Easy Japanese"[Yasashii-Nihongo]	29	5.7
Professional or trained interpreters	38	7.4
Don't know	28	5.5
Number of foreign patients per year
1-5	218	42.7
6-10	122	23.9
11-50	84	16.4
51-100	30	5.9
<=100	29	5.7
Don’t konow	28	5.5
Speculated and confirmed nationalities (multiple answer)
Brazil	270	65.7
Vietnam	231	56.2
China	305	74.2
Philippines	235	57.2
Korea	104	25.3
Nepal	37	9
English-speaking countries	218	53
Others	59	14.4
The highest level of English proficiency of pharmacists in the pharmacies
Fluent	5	1
Possible	28	5.5
Basic	415	81.2
None	52	10.2
Don't know	11	2.2
“How often are foreign patients accompanied by someone to help them as an interpreter? ”
Mostly	282	55.2
Sometimes	157	30.7
Rarely	60	11.7
Don't know	12	2.3
"Who accompanise foreign patients? " (multiple answer)
Family members (adult)	334	66.9
Family members (child)	213	42.7
Co-worker	320	64.1
Japanese friends	87	17.4
Foreign friends	118	23.6
Professional or trained interpreters	28	5.6
Don't know the relationship	82	16.4
"Have you ever been anxiety about the accuracy of ad hoc interpretation?"
Strong agree	29	5.8
Somewhat agree	173	34.7
Somewhat disagree	250	50.1
Strong disagree	37	7.4
Don't know	10	2
"Do you think foreign patients should be accompanied bysomeone who can act as interpreter?”
Strong agree	184	36
Somewhat agree	211	41.3
Somewhat disagree	60	11.7
Strong disagree	8	1.6
Neither agree nor disagree	48	9.4
The top three most frequently used communication resources. (multiple answer)
Somebody else accompanying foreign patients	367	71.8
Multilingual translation devices or apps	306	59.9
Written translated materials	254	49.7
Pharmacist's foreign languages	107	20.9
"Easy Japanese"	44	8.6
Professional or a trained interpreters	7	1.4
Never used any of these	26	5.1
