# Supplementary material for: Associations between knowledge of multilingual support resources and attitudes towards, and use of, ad hoc interpreters in pharmacies in Aichi Prefecture, Japan
Source: Research Square preprint supplement (doi:10.21203/rs.3.rs-7097925/v1), 2025-08-22
Supplement: Supplementary file 4 [file d149db6693b4be42cdf936cb.xlsx]

## Sheet: Sheet1
Table4 Factoes associated with the use of ad hoc interpreters (N=511)
	CORa)	95% CIb)	p-value	AORc)	95% CI	p-value
Number of knowledge of the multilingual support resources
0		Ref.		Ref.
1	3.01	1.35-6.74	0.007	4.02	1.60-10.1	0.003
2	7.43	3.22-17.2	<0.001	9.43	3.61-24.6	<0.001
>=3	3.35	1.21-9.30	0.02	3.73	1.18-11.8	0.02
Geographic location
Municiparties		Ref.		Ref.
Foreign concentrated city of top 5	1.08	0.64-1.84	<0.001	1.11	0.61-2.02	0.72
Capital city	0.67	0.43-1.03	<0.001	0.52	0.32-0.86	0.01
The highest level of English lproficiency of pharmacists
None		Ref.		Ref.
Basic	1.82	1.04-3.16	0.03	2.49	1.28-4.85	0.007
Possible	0.74	0.32-1.73	0.48	1.23	0.46-3.32	0.67
Number of foreign patients per year
1-10		Ref.		Ref.
11-50	0.95	0.56-1.63	<0.001	0.83	0.46-1.50	0.53
>=51	0.61	0.34-1.08	<0.001	0.54	0.28-1.03	0.06
“How often are foreign patients accompaied by someone?”
Rarely		Ref.		Ref.
Sometimes	1.8	1.02-3.18	0.04	1.7	0.90-3.23	0.11
Mostly	3.9	2.26-6.75	<0.001	4	2.17-7.38	<0.001
a ) COR=Clude Odds Ratio, b) CI=Cofidence Interval, c) AOR=Adjusted Odds Ratio
