# Supplementary material for: Associations between knowledge of multilingual support resources and attitudes towards, and use of, ad hoc interpreters in pharmacies in Aichi Prefecture, Japan
Source: Research Square preprint supplement (doi:10.21203/rs.3.rs-7097925/v1), 2025-08-22
Supplement: Supplementary file 5 [file ecfa21c04b831f6786618a84.xlsx]

## Sheet: Survey data
ID	Q1	Q2	Q3	Q4	Q5_1	Q5_2	Q5_3	Q5_4	Q5_5	Q6	Q7	Q8_1	Q8_2	Q8_3	Q8_4	Q8_5	Q8_6	Q8_7	Q8_8	Q9	Q10_1	Q10_2	Q10_3	Q10_4	Q10_5	Q10_6	Q10_7	Q11	Q12	Q13_1	Q13_2	Q13_3	Q13_4	Q13_5	Q13_6	Q13_7
1	44	3	4	3	1	0	0	0	0	1	1	1	0	1	0	0	0	0	0	1	1	0	1	0	0	0	0	2	2	0	1	0	1	1	0	0
2	52	2	4	3	1	0	0	1	0	1	4	0	1	1	1	0	0	0	0	2	1	0	1	1	0	0	0	2	3	1	1	0	0	0	0	0
3	44	1	4	3	0	0	0	0	1	2	*	*	*	*	*	*	*	*	*	*	*	*	*	*	*	*	*	*	*	*	*	*	*	*	*	*
4	14	3	2	3	1	0	0	0	0	2	*	*	*	*	*	*	*	*	*	*	*	*	*	*	*	*	*	*	*	*	*	*	*	*	*	*
5	45	7	2	3	1	0	0	0	0	1	5	1	1	1	1	0	0	1	0	2	1	1	0	0	1	0	0	1	2	0	0	0	1	1	0	0
6	10	2	2	3	1	0	0	0	0	2	*	*	*	*	*	*	*	*	*	*	*	*	*	*	*	*	*	*	*	*	*	*	*	*	*	*
7	15	2	2	3	1	0	0	0	0	1	1	1	0	0	1	0	0	0	0	1	0	0	1	0	0	0	0	4	1	0	1	0	0	1	0	0
8	5	1	1	3	1	0	0	0	0	1	1	*	*	*	*	*	*	*	*	3	0	0	1	0	0	0	0	3	1	0	0	0	1	0	0	0
9	14	1	4	3	1	0	0	1	0	1	2	1	1	1	1	1	0	1	0	2	1	1	1	1	1	0	0	3	2	1	1	0	0	1	0	0
10	30	7	1	3	1	0	0	1	0	1	1	1	1	0	0	0	0	1	1	2	1	0	1	0	0	1	0	1	1	1	1	0	0	1	0	0
11	37	3	7	3	0	0	1	1	0	1	4	1	1	1	1	1	0	0	1	2	0	1	1	1	1	0	0	3	3	1	1	1	0	0	0	0
12	48	5	2	3	1	0	0	0	0	1	1	1	1	1	1	0	0	0	0	2	0	1	1	0	0	0	0	2	1	0	0	0	0	1	0	0
13	3	5	3	3	1	0	1	1	0	1	5	0	0	1	1	0	0	1	1	2	0	1	1	0	1	0	0	3	3	0	0	1	1	1	0	0
14	44	2	2	3	1	1	1	1	0	1	1	0	0	1	0	0	0	1	0	2	1	0	0	0	0	0	0	4	2	0	0	0	0	1	0	0
15	44	7	3	4	0	0	0	0	1	1	6	0	0	1	0	0	0	1	0	3	0	0	0	1	0	0	0	2	1	1	1	1	0	0	0	0
16	10	2	4	3	1	0	0	1	0	1	1	1	0	1	0	0	0	0	0	1	1	1	1	0	0	0	0	1	1	1	1	0	0	0	0	0
17	50	1	3	4	1	0	0	1	0	1	1	1	1	1	0	0	0	0	0	1	1	1	1	0	0	0	0	2	1	1	1	0	0	1	0	0
18	35	3	2	3	1	0	0	1	0	1	4	1	1	1	0	0	0	1	0	2	0	0	0	0	1	0	0	1	1	1	1	0	0	1	0	0
19	27	8	2	3	1	0	0	1	0	1	1	0	0	1	0	0	0	1	0	2	1	0	0	0	0	0	0	2	2	1	1	0	0	1	0	0
20	9	2	3	3	1	1	0	0	0	1	2	1	0	0	0	0	0	1	1	1	1	0	1	0	0	0	0	2	1	1	1	0	0	1	0	0
21	25	2	2	3	1	0	0	0	0	1	2	1	0	1	1	1	0	1	0	1	1	0	0	0	0	0	0	3	2	1	1	0	0	0	0	0
22	35	7	2	3	1	0	0	0	0	1	6	1	0	1	0	0	0	0	0	2	0	1	0	0	0	0	0	4	1	1	0	0	0	1	0	0
23	36	7	2	3	1	1	0	1	0	1	2	1	0	1	0	0	0	1	0	3	1	1	1	1	1	0	0	2	1	1	1	0	0	1	0	0
24	37	1	3	3	1	1	0	1	0	1	3	1	1	1	1	1	0	0	0	1	1	1	1	0	0	0	0	3	2	1	1	0	0	1	0	0
25	35	1	5	3	1	0	0	1	0	1	3	1	1	1	0	0	0	0	0	1	1	1	1	0	0	0	1	3	2	1	1	0	0	1	0	0
26	4	2	5	3	1	0	0	1	0	2	*	*	*	*	*	*	*	*	*	*	*	*	*	*	*	*	*	*	*	*	*	*	*	*	*	*
27	44	4	3	4	1	0	0	0	0	1	1	0	1	1	1	0	1	0	0	1	1	0	1	0	0	0	0	2	2	0	0	0	0	0	0	1
28	36	2	7	3	1	1	1	1	0	1	4	1	1	1	1	1	0	1	0	2	1	1	1	0	0	0	0	3	2	1	1	0	0	1	0	0
29	11	3	1	3	1	0	0	1	0	2	*	*	*	*	*	*	*	*	*	*	*	*	*	*	*	*	*	*	*	*	*	*	*	*	*	*
30	44	3	2	3	1	0	0	1	0	1	3	0	1	1	0	0	0	1	0	2	1	0	0	0	0	0	1	3	1	1	1	0	0	1	0	0
31	37	2	3	3	1	0	0	0	0	2	*	*	*	*	*	*	*	*	*	*	*	*	*	*	*	*	*	*	*	*	*	*	*	*	*	*
32	10	5	3	3	1	0	0	1	0	1	1	1	0	0	0	0	0	1	0	1	1	0	1	0	0	0	0	3	1	1	1	0	0	0	0	0
33	36	2	4	3	1	0	0	1	0	1	2	1	0	0	1	1	0	0	0	1	0	0	1	0	0	0	0	4	1	1	1	0	0	1	0	0
34	25	2	4	3	1	1	0	0	0	1	2	1	0	0	0	0	0	1	0	1	1	1	1	0	0	1	0	2	2	1	0	0	1	1	0	0
35	10	3	5	3	1	0	0	0	0	1	3	1	1	1	1	1	1	1	0	2	1	1	1	0	1	0	0	2	1	1	1	0	0	0	0	0
36	44	2	3	3	1	0	0	0	0	1	1	0	0	0	1	0	0	0	0	1	0	0	1	0	0	0	0	3	1	0	0	0	0	1	0	0
37	15	1	3	3	1	0	0	0	0	1	4	1	1	1	1	0	0	0	0	2	1	1	1	0	0	0	0	2	1	0	1	0	0	1	0	0
38	44	6	2	3	1	0	0	0	0	1	3	0	0	1	0	0	0	1	0	1	1	0	0	0	0	0	0	3	1	0	0	0	0	1	0	0
39	35	7	5	4	1	0	0	1	0	1	5	1	1	1	0	0	0	0	0	1	1	0	1	0	0	0	0	2	1	1	1	0	0	1	0	0
40	44	1	2	2	1	0	0	1	0	1	2	1	1	1	1	1	1	1	0	3	0	0	1	0	0	0	1	2	5	0	1	0	1	1	0	0
41	44	2	2	2	1	0	0	1	0	1	1	1	1	0	0	0	0	1	0	1	0	0	1	0	0	0	0	3	3	0	0	0	0	1	0	0
42	50	7	2	4	1	0	0	1	0	1	3	0	0	0	0	0	0	0	1	1	1	1	1	1	0	0	1	3	2	0	1	0	0	0	0	0
43	44	6	2	3	1	0	0	0	0	1	1	0	0	1	1	1	0	0	1	3	1	0	0	0	0	0	0	3	5	1	0	1	0	1	0	0
44	47	1	4	2	1	0	0	1	0	1	4	0	1	1	1	0	1	1	0	1	1	1	1	0	0	1	0	2	2	0	1	0	1	1	0	0
45	44	2	5	4	1	0	0	0	0	2	*	*	*	*	*	*	*	*	*	*	*	*	*	*	*	*	*	*	*	*	*	*	*	*	*	*
46	5	2	2	3	0	0	0	0	1	1	1	*	*	*	*	*	*	*	*	1	1	0	0	0	0	0	0	3	2	0	0	0	0	0	0	1
47	44	1	3	3	1	0	0	1	0	1	3	0	1	1	1	1	0	1	0	2	0	0	0	0	0	0	1	1	5	1	1	0	0	1	0	0
48	19	8	3	3	0	0	0	0	1	2	*	*	*	*	*	*	*	*	*	*	*	*	*	*	*	*	*	*	*	*	*	*	*	*	*	*
49	36	5	5	4	1	0	0	0	0	2	*	*	*	*	*	*	*	*	*	*	*	*	*	*	*	*	*	*	*	*	*	*	*	*	*	*
50	39	4	3	3	1	0	0	0	0	1	3	1	1	1	1	1	0	1	0	1	0	0	1	0	0	0	0	3	2	1	1	0	1	0	0	0
51	16	2	3	3	1	0	0	1	0	1	1	0	0	1	1	0	0	1	0	1	1	1	1	0	1	0	0	3	2	1	1	0	0	1	0	0
52	18	4	4	3	1	0	1	1	0	1	3	1	1	1	1	0	0	1	0	2	1	0	0	0	0	0	0	1	2	1	1	0	0	1	0	0
53	44	1	2	3	1	0	1	0	0	1	1	1	0	1	0	0	0	0	0	2	0	0	1	0	0	0	0	2	3	0	0	1	0	1	0	0
54	6	4	2	3	1	0	0	0	0	1	2	1	1	1	0	0	0	1	0	1	1	0	1	0	0	0	1	3	2	1	1	0	0	0	0	0
55	44	4	6	2	1	0	0	1	0	1	2	1	0	0	0	0	0	1	0	1	0	0	1	1	0	0	0	3	2	1	1	0	1	0	0	0
56	10	1	1	3	1	0	0	1	0	2	*	*	*	*	*	*	*	*	*	*	*	*	*	*	*	*	*	*	*	*	*	*	*	*	*	*
57	21	4	4	5	0	0	0	0	1	1	1	0	0	0	0	0	0	1	0	1	1	1	1	0	0	0	0	3	1	0	0	0	0	0	0	1
58	46	4	1	3	1	0	0	0	0	1	1	0	0	0	0	0	0	1	0	1	1	1	0	1	0	0	0	3	1	1	0	0	0	1	0	0
59	29	1	3	3	0	0	0	0	1	1	1	0	0	1	0	0	0	0	0	2	0	0	1	0	0	0	0	3	1	0	0	0	0	0	0	1
60	20	2	4	3	1	0	0	1	0	1	1	1	0	1	1	0	1	1	0	1	0	0	0	1	1	0	1	2	1	0	1	0	0	0	0	0
61	44	3	5	3	1	1	1	1	0	2	*	*	*	*	*	*	*	*	*	*	*	*	*	*	*	*	*	*	*	*	*	*	*	*	*	*
62	48	2	4	3	1	0	0	0	0	1	3	1	1	0	1	0	0	0	0	1	0	1	1	0	0	0	0	3	2	0	1	0	0	1	0	0
63	44	2	2	3	1	0	0	0	0	1	6	0	1	1	1	0	0	1	1	2	0	0	1	0	0	0	0	2	2	0	1	0	1	1	0	0
64	44	1	3	3	1	0	0	0	0	1	1	0	0	0	0	0	0	1	0	3	0	0	0	1	0	0	0	3	2	0	0	0	0	1	0	0
65	25	3	2	3	1	0	1	1	0	1	3	1	1	1	1	1	0	1	0	2	0	0	1	0	0	0	0	2	2	0	0	1	0	1	0	0
66	45	1	1	3	1	0	0	0	0	1	2	1	1	0	0	1	0	0	0	3	1	1	0	0	0	0	0	3	3	0	1	0	1	0	0	0
67	16	3	2	4	0	0	0	1	0	1	1	*	*	*	*	*	*	*	*	1	1	0	1	1	1	1	0	3	5	0	1	0	0	0	0	0
68	21	3	5	3	1	0	0	1	0	1	2	1	0	1	1	1	0	0	1	1	1	1	0	0	1	0	0	3	2	1	1	0	0	1	0	0
69	44	1	2	3	1	0	0	0	0	1	2	1	0	1	0	1	1	0	0	2	1	1	0	0	1	0	0	2	1	1	1	0	1	0	0	0
70	21	4	2	3	0	0	0	0	1	1	1	1	0	1	1	1	0	0	0	1	1	0	0	0	0	0	0	3	1	0	1	0	0	0	0	0
71	45	1	4	3	1	0	0	1	0	1	2	0	1	1	1	0	0	0	0	2	1	1	1	1	1	0	0	2	2	0	1	0	1	1	0	0
72	53	1	1	3	1	0	0	0	0	1	1	0	1	1	0	0	0	0	0	1	0	0	1	0	0	0	0	3	2	0	1	0	1	1	0	0
73	33	5	1	3	1	1	1	1	0	1	5	1	1	1	1	1	0	1	0	1	1	0	1	1	1	0	0	3	5	0	1	0	1	1	0	0
74	44	2	3	3	1	0	0	1	0	1	3	0	0	1	1	1	0	0	0	1	1	0	1	1	0	1	0	3	2	0	1	0	0	0	1	0
75	7	6	5	3	1	0	0	0	0	1	2	0	1	1	0	0	0	1	0	2	0	1	1	1	0	0	0	1	2	0	0	0	0	0	0	1
76	51	1	6	3	1	0	0	0	0	1	6	1	1	1	1	1	0	1	0	1	1	1	1	0	0	0	0	2	5	1	1	0	0	1	0	0
77	44	3	2	3	1	0	0	1	0	1	1	0	1	1	0	0	1	0	1	3	1	1	1	0	0	0	1	3	2	1	0	0	0	1	0	0
78	33	3	3	2	1	0	0	1	0	1	2	1	1	1	0	0	0	1	1	1	1	1	1	0	1	0	0	2	2	1	1	0	1	0	0	0
79	10	2	3	3	1	0	0	1	0	2	*	*	*	*	*	*	*	*	*	*	*	*	*	*	*	*	*	*	*	*	*	*	*	*	*	*
80	37	6	3	3	1	1	0	1	0	1	5	1	0	0	1	0	0	0	0	2	1	1	1	0	0	0	0	3	2	1	1	0	0	1	0	0
81	44	2	2	3	1	0	0	1	0	1	1	0	1	0	0	0	1	0	1	1	0	0	0	0	1	0	0	2	1	1	1	0	0	0	0	0
82	26	1	3	2	1	0	0	0	0	1	5	1	1	1	1	0	0	1	1	1	1	1	0	0	0	0	0	3	3	1	0	0	0	1	0	0
83	5	1	1	4	1	0	0	0	0	1	1	0	1	0	1	0	0	0	0	2	0	0	1	0	0	0	0	2	5	0	1	0	1	0	0	0
84	51	5	4	3	1	1	0	1	0	1	3	1	1	1	1	1	0	1	0	2	1	0	1	0	0	0	0	2	2	1	1	0	0	1	0	0
85	9	3	3	3	1	0	0	1	0	1	1	0	1	0	0	0	0	0	0	1	0	0	0	0	0	0	1	5	1	0	1	0	1	1	0	0
86	14	2	5	3	1	0	0	0	0	1	3	1	1	1	1	0	0	1	0	2	1	1	1	0	0	0	0	2	2	0	1	0	0	1	0	0
87	37	3	3	3	1	0	0	1	0	1	6	*	*	*	*	*	*	*	*	4	*	*	*	*	*	*	*	*	1	0	1	1	0	0	0	0
88	26	3	5	3	1	0	0	1	0	1	4	1	1	1	1	0	0	1	0	3	1	1	1	1	1	0	0	3	2	0	1	0	1	1	0	0
89	44	1	4	3	1	0	0	1	0	2	*	*	*	*	*	*	*	*	*	*	*	*	*	*	*	*	*	*	*	*	*	*	*	*	*	*
90	14	6	3	3	1	0	0	1	0	1	1	1	1	1	0	0	0	0	0	1	1	0	1	0	1	0	0	2	5	1	1	0	0	0	0	0
91	14	2	3	5	1	0	0	0	0	1	1	*	*	*	*	*	*	*	*	1	1	1	1	0	0	0	0	3	2	0	1	0	0	1	0	0
92	5	2	4	2	1	0	0	1	0	1	1	0	1	0	1	0	0	0	0	1	0	0	1	0	0	0	0	2	5	0	1	0	0	0	0	0
93	44	2	4	3	1	0	1	1	0	1	1	1	1	1	1	0	0	1	0	1	1	0	1	0	0	0	0	2	2	0	0	1	1	0	0	0
94	36	1	1	3	1	0	0	1	0	2	*	*	*	*	*	*	*	*	*	*	*	*	*	*	*	*	*	*	*	*	*	*	*	*	*	*
95	54	7	6	3	1	0	0	1	0	1	1	1	1	0	0	0	0	0	0	2	1	0	0	0	0	0	0	3	3	1	0	0	0	1	0	0
96	14	3	2	5	1	0	0	0	0	2	*	*	*	*	*	*	*	*	*	*	*	*	*	*	*	*	*	*	*	*	*	*	*	*	*	*
97	5	1	2	4	1	0	0	0	0	1	1	0	1	1	0	1	0	0	1	1	0	0	1	0	0	0	0	4	1	0	1	0	0	1	0	0
98	15	1	8	2	1	0	0	1	0	1	2	1	1	0	1	0	0	1	1	2	1	0	1	0	0	0	0	3	2	1	1	0	1	0	0	0
99	30	2	4	3	1	0	0	1	0	1	3	1	1	1	1	0	0	1	0	1	1	1	1	0	0	0	0	3	1	1	1	0	0	1	0	0
100	44	3	3	3	1	0	0	1	0	1	1	*	*	*	*	*	*	*	*	1	1	1	1	0	0	0	0	3	3	1	1	0	0	1	0	0
101	44	3	2	3	1	0	0	1	0	1	1	0	1	1	0	0	0	1	0	1	1	1	1	1	1	0	0	3	2	1	1	0	0	1	0	0
102	10	7	2	3	1	0	0	1	0	1	1	1	0	0	1	0	0	0	1	2	0	1	0	0	0	0	0	2	5	1	0	0	0	1	0	0
103	29	4	3	3	0	0	0	0	1	1	1	*	*	*	*	*	*	*	*	2	0	0	0	0	0	0	1	2	2	0	0	0	0	1	0	0
104	44	2	3	2	1	1	0	1	0	1	3	1	1	1	0	1	1	1	0	2	0	1	1	0	1	0	0	4	5	1	0	1	1	0	0	0
105	25	3	2	5	0	0	0	1	0	1	1	*	*	*	*	*	*	*	*	1	1	1	1	0	0	0	0	3	1	1	1	0	0	1	0	0
106	11	2	3	3	1	0	0	0	0	1	1	*	*	*	*	*	*	*	*	1	1	1	1	0	0	0	1	2	1	0	1	0	0	1	0	0
107	16	6	1	3	1	0	0	1	0	1	3	1	1	1	1	0	0	1	0	2	1	0	1	0	0	1	0	1	2	1	1	0	0	0	0	0
108	10	6	3	3	1	0	0	0	0	1	1	1	0	1	1	0	0	0	0	2	0	0	1	0	0	0	1	3	1	0	1	1	0	1	0	0
109	3	7	2	3	1	0	0	1	0	1	1	*	*	*	*	*	*	*	*	2	0	1	0	1	0	0	0	3	2	1	1	0	1	0	0	0
110	44	3	4	2	1	0	0	0	0	1	3	0	0	1	0	0	0	1	1	1	1	1	0	0	1	0	1	3	2	0	1	0	1	1	0	0
111	21	2	3	3	1	0	0	1	0	1	4	1	1	1	1	0	0	1	0	1	1	1	1	0	0	0	1	2	1	1	1	0	0	1	0	0
112	29	1	1	3	1	0	0	0	0	2	*	*	*	*	*	*	*	*	*	*	*	*	*	*	*	*	*	*	*	*	*	*	*	*	*	*
113	44	2	2	3	1	0	0	1	0	1	1	0	0	1	1	0	0	0	0	2	1	1	1	0	0	0	1	3	3	0	1	0	1	1	0	0
114	32	1	4	3	1	0	0	1	0	1	2	0	1	0	0	0	0	0	0	1	0	0	1	0	0	0	0	4	1	1	1	0	1	0	0	0
115	3	1	4	3	1	0	0	1	0	1	5	1	1	1	1	1	1	1	0	2	1	1	1	0	0	0	0	3	1	1	0	0	1	1	0	0
116	14	5	4	4	1	0	0	0	0	1	2	0	1	1	0	0	0	1	0	1	1	0	0	0	0	0	0	1	1	1	1	0	0	1	0	0
117	44	2	4	3	1	0	0	0	0	1	2	*	*	*	*	*	*	*	*	1	1	1	1	1	1	0	0	2	1	0	1	0	0	1	0	0
118	44	5	5	1	1	1	0	1	0	1	5	1	1	1	1	1	1	1	1	3	1	0	1	1	1	0	0	3	3	1	1	0	1	0	0	0
119	44	4	3	4	1	0	0	0	0	2	*	*	*	*	*	*	*	*	*	*	*	*	*	*	*	*	*	*	*	*	*	*	*	*	*	*
120	44	4	1	1	0	0	0	1	0	1	1	0	0	1	0	0	0	0	0	1	1	0	0	0	0	0	0	3	3	1	0	0	1	0	0	0
121	16	5	1	3	1	0	0	1	0	1	1	1	1	1	0	0	0	0	0	1	1	0	0	0	0	0	0	4	2	0	1	0	0	1	0	0
122	44	1	4	3	1	1	0	1	0	1	2	0	0	1	0	1	0	1	0	1	1	1	0	1	1	0	0	3	1	1	1	0	0	1	0	0
123	44	3	3	3	1	0	0	0	0	2	*	*	*	*	*	*	*	*	*	*	*	*	*	*	*	*	*	*	*	*	*	*	*	*	*	*
124	15	1	3	4	1	0	0	0	0	1	1	1	0	1	0	0	0	1	0	1	1	1	1	0	0	0	0	3	1	0	0	0	0	1	0	0
125	29	6	2	3	1	0	0	0	0	1	1	0	0	0	0	0	0	1	0	1	1	0	0	0	0	0	0	3	5	0	1	0	0	0	0	0
126	44	2	3	4	1	0	0	1	0	1	6	*	*	*	*	*	*	*	*	1	0	0	1	0	0	0	0	2	1	0	1	0	0	0	0	0
127	37	1	4	2	1	0	0	1	0	1	5	1	1	1	1	0	0	1	0	1	0	1	0	0	0	1	0	2	1	1	1	0	0	1	0	0
128	22	2	2	3	1	0	0	0	0	1	2	0	0	1	0	1	0	0	1	3	0	1	0	0	0	0	0	2	2	0	0	0	0	1	0	0
129	1	2	5	5	1	0	0	0	0	2	*	*	*	*	*	*	*	*	*	*	*	*	*	*	*	*	*	*	*	*	*	*	*	*	*	*
130	44	5	4	3	1	0	0	0	0	1	1	1	0	0	0	0	0	1	1	3	1	0	1	1	0	0	0	3	4	0	1	0	0	1	0	0
131	44	6	2	4	1	1	0	1	0	2	*	*	*	*	*	*	*	*	*	*	*	*	*	*	*	*	*	*	*	*	*	*	*	*	*	*
132	14	7	3	3	1	0	0	0	0	1	3	1	1	1	1	0	0	0	0	1	1	0	0	0	0	0	0	4	2	1	0	0	0	0	0	0
133	44	3	2	3	1	0	0	0	0	1	1	0	0	0	0	0	0	1	0	1	0	0	1	0	0	0	0	3	1	1	1	0	0	1	0	0
134	10	1	4	3	0	0	0	1	0	1	1	1	0	1	0	0	0	1	0	2	0	0	1	0	0	0	0	3	2	0	0	0	0	0	0	1
135	44	3	3	3	1	0	0	0	0	1	2	1	1	1	1	1	1	0	0	3	0	0	0	0	0	1	0	2	2	1	1	1	0	0	0	0
136	37	2	1	4	1	0	0	0	0	1	1	1	0	0	0	0	0	0	0	1	1	0	0	0	0	0	0	3	2	0	0	0	0	0	0	1
137	50	7	3	3	1	0	0	1	0	1	3	1	1	1	0	0	0	1	0	2	1	1	1	0	0	0	0	3	1	1	1	0	0	1	0	0
138	44	4	4	3	1	0	0	1	0	1	1	0	0	1	1	0	0	0	0	1	1	0	0	0	1	0	0	3	3	0	0	1	1	0	0	0
139	36	4	5	3	1	0	0	0	0	1	4	1	1	1	1	1	0	0	0	2	1	1	1	0	0	0	0	2	1	0	1	0	0	1	0	0
140	19	2	3	4	1	0	0	0	0	1	1	0	1	1	1	1	0	0	0	1	0	0	1	1	0	0	1	4	1	0	0	0	0	1	0	0
141	13	2	2	3	1	0	0	0	0	2	*	*	*	*	*	*	*	*	*	*	*	*	*	*	*	*	*	*	*	*	*	*	*	*	*	*
142	21	1	2	3	1	0	0	0	0	1	3	1	1	1	0	0	0	0	0	1	1	0	1	0	0	0	1	3	1	0	0	0	0	1	0	0
143	27	7	1	3	1	0	0	0	0	1	1	*	*	*	*	*	*	*	*	3	0	0	1	0	0	0	0	2	1	0	0	0	0	0	0	1
144	6	4	5	3	1	0	0	0	0	1	6	0	1	1	0	0	0	0	1	2	1	0	1	0	0	0	0	4	2	0	0	0	0	1	0	0
145	21	3	2	3	1	0	0	1	0	1	4	1	1	1	1	1	0	1	0	1	1	1	0	0	0	0	1	2	2	0	1	0	0	1	0	0
146	44	2	5	3	1	1	0	1	0	1	1	0	0	1	0	0	0	1	0	1	1	0	1	0	0	0	0	4	1	0	1	0	0	1	0	0
147	44	7	5	3	1	0	1	1	0	1	2	1	1	1	0	1	0	1	0	2	0	1	1	0	0	1	0	2	2	1	1	1	0	0	0	0
148	2	1	7	3	1	0	0	1	0	1	2	1	1	1	1	0	0	1	0	1	1	0	1	0	0	0	0	3	1	1	1	0	0	1	0	0
149	5	5	2	3	1	0	0	0	0	2	*	*	*	*	*	*	*	*	*	*	*	*	*	*	*	*	*	*	*	*	*	*	*	*	*	*
150	44	6	7	3	1	0	0	1	0	1	5	1	1	1	1	1	1	1	1	2	1	1	0	0	0	0	0	2	2	1	0	0	1	1	0	0
151	35	1	3	3	1	0	0	0	0	1	5	1	1	0	1	0	0	1	0	2	1	1	1	1	0	0	0	1	4	0	1	0	0	1	0	0
152	33	1	1	2	1	0	0	0	0	1	1	1	0	1	0	0	0	0	0	1	1	0	1	0	0	0	0	3	2	1	1	0	1	0	0	0
153	30	2	3	3	1	0	0	0	0	1	2	1	1	1	0	0	0	0	1	3	0	0	0	0	1	0	0	1	1	1	1	0	0	1	0	0
154	44	3	4	3	1	0	0	0	0	1	1	0	0	1	0	0	0	0	0	1	1	0	0	1	0	0	0	3	2	1	1	0	0	0	0	0
155	22	2	4	2	1	0	0	0	0	1	6	*	*	*	*	*	*	*	*	3	0	1	1	0	0	0	0	2	2	0	0	0	0	0	0	1
156	44	8	2	4	1	0	1	0	0	1	1	1	0	1	1	0	0	1	0	1	1	1	1	0	0	0	0	4	1	0	1	0	0	1	0	0
157	44	4	3	3	1	0	0	0	0	2	*	*	*	*	*	*	*	*	*	*	*	*	*	*	*	*	*	*	*	*	*	*	*	*	*	*
158	35	7	3	4	1	0	0	1	0	1	2	1	0	0	0	0	0	0	0	1	0	0	1	0	0	0	0	3	1	0	1	0	0	0	0	0
159	2	4	3	3	1	0	0	1	0	1	6	0	0	1	1	1	0	0	0	1	1	1	1	0	0	0	0	3	5	1	1	1	0	0	0	0
160	47	4	3	3	1	0	0	0	0	1	1	*	*	*	*	*	*	*	*	1	0	0	1	0	0	0	0	3	1	0	1	0	0	0	0	0
161	10	2	1	3	1	0	0	0	0	1	3	1	1	1	1	0	0	1	0	1	1	0	1	0	0	0	0	4	1	0	1	0	0	0	0	0
162	6	4	3	3	1	0	1	1	0	1	2	1	0	1	1	1	0	1	0	1	1	0	1	1	0	0	0	2	2	0	1	0	0	1	0	0
163	50	2	5	3	1	0	0	1	0	1	2	1	1	1	1	1	0	0	0	2	1	1	1	0	1	1	0	3	2	1	1	0	1	0	0	0
164	44	1	3	3	0	0	0	0	1	2	*	*	*	*	*	*	*	*	*	*	*	*	*	*	*	*	*	*	*	*	*	*	*	*	*	*
165	44	3	2	3	1	0	0	1	0	1	1	1	0	1	1	0	0	0	0	1	1	0	1	0	0	0	0	2	1	0	1	1	0	1	0	0
166	31	3	1	3	1	0	0	0	0	1	1	0	1	1	1	0	0	1	0	1	1	0	0	0	1	0	0	1	2	0	1	0	0	1	0	0
167	44	1	1	3	1	0	0	0	0	1	1	0	0	1	0	0	0	1	0	3	0	0	0	0	0	0	1	5	5	0	0	0	0	1	0	0
168	44	2	3	3	1	0	0	1	0	1	1	*	*	*	*	*	*	*	*	3	1	1	1	0	0	0	0	3	4	0	0	0	1	1	0	0
169	7	2	4	3	1	0	0	0	0	1	2	1	0	0	0	0	0	1	0	1	1	1	1	0	0	0	1	3	1	1	1	0	0	1	0	0
170	44	4	3	3	1	0	0	1	0	1	4	1	0	1	1	0	0	1	0	1	1	1	0	1	0	0	0	3	2	1	0	0	1	1	0	0
171	45	2	3	3	1	0	1	1	0	1	2	1	1	0	0	0	0	0	0	1	1	0	1	0	0	0	0	3	2	0	1	0	0	1	0	0
172	35	3	1	3	0	0	0	1	0	1	3	1	1	1	1	0	0	1	0	2	1	0	1	0	0	1	0	2	1	0	0	0	0	0	0	1
173	32	2	3	3	1	0	0	0	0	1	2	1	1	1	1	0	0	0	0	1	1	1	1	0	0	0	0	3	3	0	1	0	0	1	0	0
174	44	2	3	3	1	0	0	0	0	1	1	0	1	1	0	0	0	0	0	1	1	0	1	0	0	0	0	3	2	1	1	0	0	1	0	0
175	7	2	4	3	1	0	0	1	0	1	1	1	0	1	0	0	0	0	0	3	1	0	1	1	1	0	0	2	2	0	0	1	0	0	0	0
176	37	7	2	4	1	0	0	1	0	1	1	1	0	0	0	0	0	0	0	2	1	1	1	0	0	0	0	2	2	0	1	0	0	1	0	0
177	29	2	3	3	1	0	0	0	0	1	1	0	1	0	0	0	0	0	0	2	0	0	1	0	0	0	0	2	2	0	0	0	0	1	0	0
178	45	1	5	3	1	0	1	0	0	1	5	1	1	1	1	1	0	0	0	1	0	0	1	0	0	0	0	3	1	0	0	1	0	1	0	0
179	3	2	7	3	1	0	0	1	0	1	1	1	0	0	1	0	0	1	1	1	1	1	1	0	0	0	0	2	5	1	1	0	1	0	0	0
180	44	1	1	3	1	0	0	0	0	1	1	1	1	1	1	0	0	0	1	2	0	0	1	0	0	0	0	2	1	0	0	0	0	1	1	0
181	7	6	3	3	1	0	0	0	0	1	2	1	1	0	1	0	0	0	0	2	1	1	0	0	1	0	0	3	1	1	1	0	0	1	0	0
182	50	2	3	4	1	0	0	1	0	1	4	1	1	1	1	1	0	1	0	1	1	1	1	0	0	0	0	3	1	1	1	0	0	1	0	0
183	54	3	4	3	0	0	0	0	1	1	6	*	*	*	*	*	*	*	*	2	0	0	0	0	0	0	1	2	1	0	0	0	0	0	0	1
184	2	3	7	3	0	0	0	1	0	1	1	1	1	1	1	0	0	1	0	1	1	0	1	1	1	0	0	1	1	1	1	0	0	1	0	0
185	44	1	2	4	1	0	0	0	0	2	*	*	*	*	*	*	*	*	*	*	*	*	*	*	*	*	*	*	*	*	*	*	*	*	*	*
186	51	2	3	3	1	0	0	1	0	1	3	0	1	1	1	0	0	0	0	1	1	0	0	0	1	0	0	2	1	0	0	0	0	1	0	0
187	44	2	2	3	1	1	0	1	0	1	1	0	0	1	0	0	0	0	0	1	0	0	0	0	0	0	1	3	1	1	0	0	0	0	0	0
188	44	2	5	3	1	0	0	1	0	1	3	1	1	1	1	1	1	0	0	2	0	0	0	0	1	0	0	2	2	1	1	0	0	1	0	0
189	44	5	3	3	1	0	0	1	0	1	3	1	1	1	1	1	1	1	0	1	1	1	0	0	1	0	0	3	2	1	1	0	0	1	0	0
190	50	2	4	3	1	0	0	0	0	1	6	1	1	1	1	0	0	0	1	1	1	1	0	0	0	0	0	2	1	0	1	0	0	1	0	0
191	44	2	1	3	1	1	0	1	0	1	3	0	0	1	0	1	1	0	1	1	0	0	0	0	1	0	0	3	2	0	1	1	1	0	0	0
192	32	2	5	3	1	0	1	0	0	1	1	0	0	1	1	1	0	1	0	1	1	0	0	0	0	0	0	2	2	1	1	1	0	0	0	0
193	44	1	3	4	1	0	0	0	0	1	1	*	*	*	*	*	*	*	*	4	*	*	*	*	*	*	*	*	2	0	0	0	0	1	0	0
194	44	2	3	3	1	0	0	1	0	1	2	1	0	1	1	1	0	0	0	1	1	1	0	0	0	0	0	3	1	1	1	0	0	1	0	0
195	16	6	1	4	1	1	0	0	0	1	2	1	0	1	1	0	0	1	0	3	0	1	1	1	0	0	0	4	2	1	1	0	0	1	0	0
196	14	3	3	3	1	0	0	0	0	1	1	0	0	1	1	0	0	0	0	4	*	*	*	*	*	*	*	*	1	1	0	0	0	0	0	0
197	44	4	2	3	1	0	0	0	0	1	1	*	*	*	*	*	*	*	*	1	1	1	0	0	0	0	0	5	2	0	1	0	0	0	0	0
198	33	2	5	3	1	0	0	0	0	1	3	1	1	1	1	0	1	0	0	2	1	0	0	0	0	0	0	3	3	0	0	0	0	1	0	0
199	3	2	3	3	1	0	0	1	0	1	2	0	1	1	1	1	0	1	1	2	0	0	1	0	0	0	0	3	2	0	0	0	1	1	0	0
200	44	5	4	4	1	0	0	1	0	1	1	*	*	*	*	*	*	*	*	1	0	0	1	1	0	0	1	3	2	0	1	0	0	0	0	0
201	36	1	1	3	1	0	0	1	0	1	1	1	0	1	1	1	0	1	1	1	1	0	1	0	0	0	1	3	1	1	1	0	0	1	0	0
202	44	1	3	4	0	0	1	0	0	1	1	0	0	1	0	0	0	0	1	3	0	1	0	0	0	0	0	1	1	1	0	1	1	0	0	0
203	44	1	2	3	1	0	0	1	0	1	3	0	0	1	0	0	0	1	0	3	1	0	1	0	0	1	1	3	3	1	0	0	1	1	0	0
204	5	1	3	3	1	0	0	0	0	1	1	0	1	1	0	0	0	0	0	1	1	0	1	0	0	0	0	3	2	0	1	0	0	1	0	0
205	30	7	1	4	0	0	0	0	1	1	6	*	*	*	*	*	*	*	*	1	0	0	0	0	0	0	1	2	1	0	0	0	0	0	0	1
206	31	1	1	4	1	0	0	0	0	2	*	*	*	*	*	*	*	*	*	*	*	*	*	*	*	*	*	*	*	*	*	*	*	*	*	*
207	10	5	3	3	1	0	0	1	0	1	3	1	1	1	0	0	0	0	0	3	0	1	1	0	0	0	1	2	1	1	1	0	0	1	0	0
208	8	1	1	3	1	0	0	0	0	1	1	1	0	0	0	0	0	0	0	1	1	1	1	0	0	0	0	3	1	1	1	0	0	1	0	0
209	44	2	2	3	1	0	0	1	0	1	4	0	1	1	0	0	0	1	0	2	1	0	0	0	0	0	0	3	3	1	1	0	1	0	0	0
210	19	2	5	2	0	0	0	1	0	1	2	1	1	1	1	0	0	1	0	2	1	0	0	1	0	0	0	2	3	1	1	0	0	0	0	0
211	44	2	3	3	1	0	0	1	0	2	*	*	*	*	*	*	*	*	*	*	*	*	*	*	*	*	*	*	*	*	*	*	*	*	*	*
212	44	2	4	3	1	0	0	0	0	1	1	0	0	0	0	0	0	1	0	2	1	1	0	1	0	0	1	2	2	1	0	0	0	1	0	0
213	5	1	1	4	1	0	0	0	0	1	3	0	0	1	1	0	0	0	0	3	1	0	0	0	1	0	0	1	1	1	1	0	0	1	0	0
214	46	4	3	3	1	0	0	0	0	1	3	*	*	*	*	*	*	*	*	2	0	0	0	0	0	0	1	3	2	0	0	1	0	0	0	0
215	23	6	3	3	1	0	0	1	0	1	1	1	0	0	1	0	0	0	0	1	1	0	1	0	0	0	0	3	2	0	1	1	0	1	0	0
216	44	3	7	3	1	0	0	1	0	1	1	0	1	1	0	0	0	1	0	1	0	0	1	1	1	0	0	2	1	0	1	0	1	1	0	0
217	17	1	5	3	1	0	0	0	0	1	2	1	1	1	1	0	0	0	0	1	0	0	0	1	1	0	0	2	1	0	1	0	0	1	0	0
218	35	2	2	3	1	0	1	1	0	1	1	1	1	0	0	0	0	0	0	1	0	0	1	0	0	0	0	3	2	0	1	1	0	0	0	0
219	28	2	2	3	1	0	0	0	0	2	*	*	*	*	*	*	*	*	*	*	*	*	*	*	*	*	*	*	*	*	*	*	*	*	*	*
220	5	1	1	4	1	0	0	0	0	2	*	*	*	*	*	*	*	*	*	*	*	*	*	*	*	*	*	*	*	*	*	*	*	*	*	*
221	46	5	7	3	1	0	1	1	0	1	1	*	*	*	*	*	*	*	*	2	1	0	1	1	1	0	0	2	3	1	1	1	0	0	0	0
222	9	7	2	5	1	0	0	1	0	1	2	1	1	1	0	0	0	1	0	3	1	0	1	1	1	1	0	2	1	0	1	0	0	0	0	0
223	36	2	4	3	1	0	0	1	0	1	5	1	1	1	1	0	0	1	0	2	1	1	1	1	1	0	0	3	2	1	1	0	0	1	0	0
224	21	5	4	3	1	0	0	1	0	1	3	1	1	1	1	1	0	1	1	2	1	1	1	1	0	0	0	3	2	1	1	0	0	1	0	0
225	44	3	4	3	1	0	0	0	0	1	2	0	1	0	1	0	0	1	0	3	1	1	0	0	0	0	0	1	3	0	0	0	0	1	0	0
226	35	3	3	3	1	0	0	1	0	1	5	*	*	*	*	*	*	*	*	1	1	0	0	0	0	0	0	3	2	1	0	0	0	0	0	0
227	44	5	7	3	1	0	0	1	0	1	2	*	*	*	*	*	*	*	*	1	1	1	1	0	1	0	0	3	2	0	1	0	0	0	0	0
228	12	2	3	3	1	0	0	1	0	1	1	*	*	*	*	*	*	*	*	1	1	0	1	0	1	0	0	3	1	1	1	0	0	1	0	0
229	21	2	4	4	1	0	0	1	0	1	6	*	*	*	*	*	*	*	*	1	1	1	0	1	1	0	1	3	1	0	1	1	0	0	0	0
230	5	5	3	4	1	0	0	1	0	1	1	*	*	*	*	*	*	*	*	1	1	0	1	0	0	0	0	3	1	1	0	0	0	1	0	0
231	37	2	4	3	1	0	0	1	0	1	5	1	1	1	1	1	1	1	0	2	1	1	1	0	0	0	0	2	2	1	1	0	0	1	0	0
232	45	6	1	3	1	0	0	1	0	1	2	1	1	1	0	0	0	0	1	2	0	1	1	0	0	0	0	3	4	1	1	0	0	1	0	0
233	47	1	3	3	1	1	0	0	0	1	1	*	*	*	*	*	*	*	*	1	1	1	0	0	0	0	0	3	1	0	1	0	0	0	0	0
234	31	5	2	4	0	0	0	0	1	2	*	*	*	*	*	*	*	*	*	*	*	*	*	*	*	*	*	*	*	*	*	*	*	*	*	*
235	44	3	2	3	1	0	1	1	0	2	*	*	*	*	*	*	*	*	*	*	*	*	*	*	*	*	*	*	*	*	*	*	*	*	*	*
236	44	5	3	3	1	0	0	0	0	1	2	1	0	1	0	1	0	1	0	2	1	0	0	0	0	0	0	2	3	1	1	0	1	0	0	0
237	44	2	1	3	1	0	0	0	0	2	*	*	*	*	*	*	*	*	*	*	*	*	*	*	*	*	*	*	*	*	*	*	*	*	*	*
238	51	5	5	3	1	0	0	1	0	1	5	1	1	1	1	1	0	1	0	1	0	0	1	0	1	0	0	2	4	1	1	0	0	1	0	0
239	44	1	5	3	1	0	0	1	0	1	1	1	0	1	0	0	0	0	0	1	0	1	1	0	0	0	0	3	1	0	0	0	0	1	0	0
240	39	2	1	3	1	0	0	1	0	2	*	*	*	*	*	*	*	*	*	*	*	*	*	*	*	*	*	*	*	*	*	*	*	*	*	*
241	44	6	3	3	1	0	0	0	0	1	1	0	0	0	0	1	0	0	0	1	1	0	1	0	0	0	1	3	1	1	0	0	0	1	0	0
242	44	6	5	3	1	0	0	1	0	1	1	0	0	1	0	0	0	1	0	2	1	0	0	0	0	0	0	2	1	1	1	0	0	1	0	0
243	47	1	3	3	1	0	0	0	0	1	1	1	0	1	1	0	0	1	0	1	0	0	1	0	0	0	0	3	2	1	1	0	0	1	0	0
244	23	1	3	3	1	1	0	0	0	2	*	*	*	*	*	*	*	*	*	*	*	*	*	*	*	*	*	*	*	*	*	*	*	*	*	*
245	10	1	4	3	1	0	0	0	0	1	2	1	0	1	1	0	0	0	0	1	0	0	1	0	0	0	0	2	2	0	0	0	0	1	0	0
246	50	1	4	3	1	0	0	0	0	1	3	1	1	1	1	0	0	0	0	2	1	1	1	0	1	0	0	3	2	1	1	0	1	0	0	0
247	36	7	2	3	1	0	0	1	0	1	2	0	0	1	0	0	0	1	0	1	1	1	1	0	0	0	0	3	2	1	1	0	0	1	0	0
248	5	3	5	4	1	0	0	0	0	1	1	*	*	*	*	*	*	*	*	1	0	0	1	0	0	0	0	2	3	0	0	0	0	0	0	1
249	36	5	4	3	1	0	0	0	0	1	5	1	1	1	0	0	0	1	0	3	0	0	1	0	0	0	0	3	2	0	1	0	0	1	0	0
250	5	1	5	3	1	0	0	1	0	1	3	1	0	1	1	0	0	1	0	2	0	0	1	0	0	0	0	3	5	1	1	0	0	1	0	0
251	3	5	7	3	1	0	1	1	0	1	4	1	0	1	1	1	0	1	0	1	1	1	1	1	1	0	0	3	2	1	1	1	0	0	0	0
252	34	3	4	2	1	0	0	0	0	1	1	1	0	0	0	0	0	1	0	1	1	0	1	0	0	0	1	2	3	0	0	0	1	1	0	0
253	49	4	4	3	1	0	0	1	0	1	1	1	1	0	1	0	0	0	0	1	1	1	0	0	0	0	0	3	1	0	1	0	1	0	0	0
254	1	5	7	3	0	0	0	1	0	1	3	*	*	*	*	*	*	*	*	1	1	0	1	0	0	0	0	3	1	1	1	0	0	0	0	0
255	34	4	3	3	1	0	0	1	0	1	1	1	0	0	0	0	0	0	0	2	0	0	0	0	1	0	0	5	2	0	1	0	0	1	0	0
256	5	3	2	3	1	1	0	1	0	1	3	1	1	1	1	0	1	1	1	2	1	1	1	1	1	0	0	3	2	0	1	0	1	1	0	0
257	44	3	3	3	1	0	0	1	0	1	2	0	0	0	0	0	0	1	0	2	0	0	0	0	1	0	0	2	3	1	1	0	0	0	0	0
258	20	5	2	3	1	0	0	0	0	2	*	*	*	*	*	*	*	*	*	*	*	*	*	*	*	*	*	*	*	*	*	*	*	*	*	*
259	3	1	1	3	0	0	0	0	1	1	1	1	1	1	1	0	0	0	1	4	*	*	*	*	*	*	*	*	5	0	0	0	0	0	0	1
260	15	7	4	3	1	0	0	1	0	1	1	1	0	1	1	0	0	1	0	2	0	0	0	0	0	0	1	3	2	1	1	0	0	1	0	0
261	44	2	2	3	1	0	0	1	0	1	1	1	1	0	0	1	0	1	0	1	1	0	1	0	0	0	0	2	2	0	1	0	0	1	0	0
262	10	8	2	3	0	0	0	0	1	1	1	0	0	1	0	0	0	1	0	1	1	1	0	0	0	0	1	2	2	0	0	0	0	0	0	1
263	37	3	2	3	1	0	0	1	0	1	5	1	1	0	1	1	0	1	1	1	1	1	0	1	0	0	0	2	3	0	1	0	1	0	0	0
264	44	2	1	4	1	0	0	0	0	2	*	*	*	*	*	*	*	*	*	*	*	*	*	*	*	*	*	*	*	*	*	*	*	*	*	*
265	53	7	1	3	1	0	0	1	0	1	1	*	*	*	*	*	*	*	*	1	1	1	0	0	0	0	0	2	2	1	1	0	0	1	0	0
266	49	2	3	4	0	0	0	0	1	2	*	*	*	*	*	*	*	*	*	*	*	*	*	*	*	*	*	*	*	*	*	*	*	*	*	*
267	44	1	1	3	1	0	1	1	0	1	2	0	0	1	0	1	0	1	0	1	0	0	1	1	1	0	0	2	2	1	1	0	1	0	0	0
268	48	3	4	3	1	0	0	0	0	1	1	1	1	0	0	0	0	0	0	1	1	0	1	0	0	0	0	3	1	1	1	0	0	1	0	0
269	14	8	3	3	0	0	0	1	0	1	3	0	1	0	1	0	0	1	0	2	1	0	0	0	0	0	0	2	1	1	1	0	0	1	0	0
270	10	3	4	4	0	0	0	0	1	1	2	*	*	*	*	*	*	*	*	1	1	1	1	0	0	1	0	3	2	0	0	0	0	0	0	1
271	8	4	4	3	1	1	0	0	0	1	2	0	1	1	1	1	0	1	0	1	0	0	1	0	0	0	0	2	2	1	1	0	0	1	0	0
272	15	5	7	3	1	0	0	1	0	1	6	1	1	1	0	0	0	0	0	1	1	1	1	0	0	1	0	3	1	0	1	0	0	0	0	0
273	14	7	7	4	0	0	1	0	0	2	*	*	*	*	*	*	*	*	*	*	*	*	*	*	*	*	*	*	*	*	*	*	*	*	*	*
274	3	1	5	3	1	0	0	0	0	1	1	*	*	*	*	*	*	*	*	1	1	1	1	0	0	0	0	2	1	1	1	0	0	1	0	0
275	3	2	4	5	1	0	0	0	0	2	*	*	*	*	*	*	*	*	*	*	*	*	*	*	*	*	*	*	*	*	*	*	*	*	*	*
276	25	5	1	5	0	0	0	0	1	1	2	*	*	*	*	*	*	*	*	4	*	*	*	*	*	*	*	*	5	0	0	0	0	0	0	1
277	44	5	4	3	1	0	0	0	0	2	*	*	*	*	*	*	*	*	*	*	*	*	*	*	*	*	*	*	*	*	*	*	*	*	*	*
278	44	1	4	3	1	0	0	1	0	1	2	0	0	1	1	1	0	1	0	3	0	0	0	0	1	0	0	3	2	1	1	0	0	1	0	0
279	44	4	3	4	1	0	0	0	0	2	*	*	*	*	*	*	*	*	*	*	*	*	*	*	*	*	*	*	*	*	*	*	*	*	*	*
280	44	5	3	3	1	0	0	1	0	1	4	1	1	1	1	1	0	1	0	3	1	0	1	0	1	0	0	3	3	1	1	0	0	1	0	0
281	36	6	1	3	1	0	0	1	0	1	2	0	1	1	0	0	0	1	0	3	0	0	0	0	1	0	0	5	2	0	0	0	0	1	0	0
282	44	3	7	4	1	0	0	0	0	1	1	*	*	*	*	*	*	*	*	1	1	1	0	0	0	0	0	2	1	0	1	0	0	0	0	0
283	44	1	1	3	1	0	0	0	0	2	*	*	*	*	*	*	*	*	*	*	*	*	*	*	*	*	*	*	*	*	*	*	*	*	*	*
284	9	3	1	3	1	0	0	0	0	2	*	*	*	*	*	*	*	*	*	*	*	*	*	*	*	*	*	*	*	*	*	*	*	*	*	*
285	50	6	5	4	1	0	0	0	0	1	5	1	1	0	0	0	0	0	0	4	*	*	*	*	*	*	*	*	1	0	0	0	0	1	0	0
286	37	2	3	5	0	0	0	0	1	2	*	*	*	*	*	*	*	*	*	*	*	*	*	*	*	*	*	*	*	*	*	*	*	*	*	*
287	44	2	1	3	1	0	0	0	0	1	1	*	*	*	*	*	*	*	*	4	*	*	*	*	*	*	*	*	2	0	1	0	0	0	0	0
288	44	1	3	3	1	0	0	1	0	1	2	0	0	1	0	0	0	1	0	3	1	0	0	0	0	0	0	3	2	0	1	0	1	1	0	0
289	44	1	2	3	1	0	0	0	0	1	1	*	*	*	*	*	*	*	*	2	1	0	0	0	0	0	0	2	1	1	0	0	0	0	0	0
290	10	2	3	3	1	0	0	0	0	1	1	1	0	0	0	0	0	1	0	3	0	1	0	0	0	0	0	3	2	1	0	0	0	0	0	0
291	37	3	3	3	1	1	0	0	0	1	2	1	1	1	1	0	0	0	0	1	1	1	1	0	0	0	0	3	1	1	1	0	0	0	1	0
292	3	6	3	3	0	0	0	0	1	2	*	*	*	*	*	*	*	*	*	*	*	*	*	*	*	*	*	*	*	*	*	*	*	*	*	*
293	10	3	4	3	1	0	0	1	0	1	1	*	*	*	*	*	*	*	*	1	1	0	1	0	0	0	0	3	1	0	1	0	0	1	0	0
294	49	2	3	3	1	1	0	1	0	1	1	1	1	1	0	0	0	1	0	1	1	1	1	0	1	0	0	2	2	1	1	0	0	1	0	0
295	10	2	3	3	1	0	0	0	0	1	2	1	1	0	1	0	0	0	0	2	1	0	0	0	1	0	0	4	1	0	1	0	0	0	0	0
296	36	2	3	3	1	1	0	0	0	2	*	*	*	*	*	*	*	*	*	*	*	*	*	*	*	*	*	*	*	*	*	*	*	*	*	*
297	44	7	7	4	1	0	0	0	0	1	2	1	1	1	1	0	0	0	0	3	1	1	1	0	0	0	0	5	1	1	1	0	0	1	0	0
298	44	4	6	3	1	0	0	0	0	1	2	0	0	1	0	0	0	1	0	2	1	1	0	0	0	0	0	3	2	0	1	0	1	0	0	0
299	16	4	3	3	1	0	0	1	0	1	2	*	*	*	*	*	*	*	*	1	1	0	1	0	0	0	0	2	4	1	1	0	0	0	0	0
300	19	1	2	3	1	1	0	1	0	1	1	0	1	0	1	0	0	0	0	1	1	1	0	0	0	0	0	2	2	0	0	0	0	0	0	1
301	44	5	2	3	1	0	0	0	0	1	2	1	1	1	1	1	0	1	0	2	0	1	1	1	0	0	0	2	2	1	1	0	0	1	0	0
302	11	1	2	4	1	0	0	0	0	2	*	*	*	*	*	*	*	*	*	*	*	*	*	*	*	*	*	*	*	*	*	*	*	*	*	*
303	44	4	5	3	1	0	0	1	0	1	1	0	0	1	1	1	0	0	0	2	1	0	1	0	0	0	0	3	5	1	1	0	0	1	0	0
304	37	7	2	3	1	0	0	1	0	1	3	0	0	0	0	0	0	0	1	2	1	1	0	0	0	0	0	2	5	1	1	0	0	1	0	0
305	44	5	4	3	1	0	0	1	0	1	2	1	1	1	1	1	0	0	1	2	0	0	1	0	0	0	1	2	5	1	0	0	0	1	0	0
306	37	2	3	3	1	0	0	1	0	1	1	1	1	1	1	1	0	1	0	1	1	0	1	0	1	0	0	4	1	1	1	0	0	0	0	0
307	44	1	1	3	1	0	0	1	0	2	*	*	*	*	*	*	*	*	*	*	*	*	*	*	*	*	*	*	*	*	*	*	*	*	*	*
308	44	2	1	3	1	0	0	1	0	2	*	*	*	*	*	*	*	*	*	*	*	*	*	*	*	*	*	*	*	*	*	*	*	*	*	*
309	35	5	2	3	1	0	0	1	0	1	3	1	1	1	1	0	0	1	0	1	1	1	0	1	1	0	1	2	3	1	1	0	0	1	0	0
310	36	3	4	3	1	0	0	1	0	1	6	*	*	*	*	*	*	*	*	2	1	0	1	0	1	0	0	2	5	0	1	0	1	1	0	0
311	32	2	2	3	1	0	0	1	0	1	1	0	1	0	1	0	0	0	0	1	1	0	1	1	0	0	0	3	1	1	1	0	0	1	0	0
312	15	1	2	3	1	0	0	0	0	1	3	1	0	1	1	0	0	0	0	1	0	0	1	0	0	0	0	3	1	0	1	1	1	0	0	0
313	27	4	4	3	1	0	0	1	0	1	3	0	1	1	0	0	0	1	0	1	1	0	1	0	1	0	0	3	1	1	1	0	0	1	0	0
314	46	2	1	3	1	0	0	0	0	1	1	0	0	0	0	0	0	0	1	3	0	0	0	0	1	0	0	1	2	0	0	0	0	1	0	0
315	41	1	1	3	1	0	1	0	0	1	1	*	*	*	*	*	*	*	*	3	1	0	0	0	0	0	0	3	1	0	1	0	0	1	0	0
316	44	3	7	3	1	1	0	0	0	1	3	0	0	1	0	0	0	1	0	3	1	1	1	0	0	0	0	3	2	0	0	1	1	0	0	0
317	32	2	3	3	1	0	0	0	0	1	1	1	0	0	0	0	0	1	0	1	1	0	1	1	1	0	0	5	1	0	0	0	0	1	0	0
318	11	6	5	4	1	0	0	1	0	1	3	*	*	*	*	*	*	*	*	2	1	0	0	0	0	0	0	2	1	1	0	0	0	0	0	0
319	44	3	4	3	1	0	0	1	0	1	6	*	*	*	*	*	*	*	*	3	1	0	0	0	0	0	0	3	5	1	1	0	1	0	0	0
320	54	4	4	3	1	0	0	0	0	1	4	1	0	1	1	1	0	1	0	1	1	1	1	0	0	0	0	2	2	1	0	0	0	1	1	0
321	35	3	3	3	1	0	0	0	0	1	3	*	*	*	*	*	*	*	*	1	1	1	1	0	1	0	0	3	3	0	1	0	0	1	0	0
322	9	2	2	3	1	0	0	1	0	1	3	1	1	1	1	0	0	0	1	2	1	1	1	0	0	0	1	3	3	1	1	0	0	1	0	0
323	44	4	4	3	1	0	0	0	0	1	1	0	0	1	1	0	0	1	0	2	1	0	0	1	0	0	0	2	3	0	1	0	0	1	0	0
324	44	4	3	3	1	0	0	0	0	1	1	*	*	*	*	*	*	*	*	1	1	0	1	0	1	0	0	3	3	0	1	0	0	1	0	0
325	37	6	2	3	1	0	0	1	0	1	2	1	0	0	0	0	0	0	1	2	0	0	1	0	0	0	0	3	2	1	0	0	1	1	0	0
326	50	1	1	3	1	0	0	0	0	1	1	0	1	1	1	0	0	0	0	1	0	1	0	0	0	0	0	3	5	0	1	0	0	1	0	0
327	5	3	3	3	1	0	0	0	0	2	*	*	*	*	*	*	*	*	*	*	*	*	*	*	*	*	*	*	*	*	*	*	*	*	*	*
328	44	1	4	3	1	0	0	1	0	1	1	*	*	*	*	*	*	*	*	1	1	0	1	1	0	0	0	4	3	1	1	0	0	1	0	0
329	27	7	1	3	1	0	0	0	0	1	2	1	0	1	0	0	0	1	0	1	1	0	1	0	0	0	0	4	2	0	0	0	0	1	0	0
330	44	3	2	3	1	0	0	1	0	1	1	1	0	1	0	0	0	1	0	1	1	0	1	1	0	0	0	4	2	1	1	0	0	0	0	0
331	35	3	4	3	1	0	0	1	0	1	3	1	1	0	1	0	0	1	0	2	0	1	1	0	0	0	1	3	1	1	1	0	0	0	0	0
332	48	3	3	3	1	0	0	0	0	1	1	1	1	1	1	0	0	0	0	2	0	0	0	0	0	0	1	3	1	0	1	0	0	1	0	0
333	14	7	7	4	1	0	0	0	0	1	1	0	0	0	1	0	0	0	0	1	1	0	1	0	0	0	0	3	1	1	1	0	0	1	0	0
334	2	3	2	3	0	0	0	0	1	2	*	*	*	*	*	*	*	*	*	*	*	*	*	*	*	*	*	*	*	*	*	*	*	*	*	*
335	15	2	4	5	1	0	0	0	0	1	3	0	1	1	1	0	0	0	0	1	1	0	1	0	0	0	0	3	1	0	1	0	0	0	0	0
336	36	8	4	3	1	0	0	0	0	1	4	1	1	1	1	0	0	0	0	3	1	0	0	1	0	0	0	2	2	1	1	0	0	0	0	0
337	8	4	4	3	1	0	0	0	0	1	4	1	0	1	1	1	0	1	0	2	1	1	1	1	1	0	0	2	5	0	1	0	0	1	1	0
338	37	1	3	3	0	0	0	0	1	1	3	1	1	1	1	1	0	1	0	2	1	1	1	1	1	0	1	2	2	0	1	0	0	0	0	0
339	37	2	3	3	1	0	0	1	0	1	5	1	1	1	1	0	0	1	0	3	0	0	1	0	0	0	0	1	2	1	1	0	0	1	0	0
340	36	1	4	3	1	0	0	0	0	1	3	1	1	1	1	0	0	0	0	1	0	0	1	0	0	0	0	3	1	1	1	0	0	1	0	0
341	37	1	2	3	1	0	0	0	0	1	3	1	0	1	1	0	0	0	0	2	1	0	0	0	0	0	0	3	2	0	1	0	0	0	0	0
342	2	2	5	3	1	0	0	1	0	1	2	*	*	*	*	*	*	*	*	2	0	0	1	0	0	0	0	3	2	1	1	1	0	0	0	0
343	33	4	5	3	0	0	0	0	1	1	2	0	0	1	1	1	0	1	0	1	1	1	1	0	0	0	0	3	5	1	1	0	0	0	0	0
344	35	3	3	5	1	0	0	1	0	1	3	1	1	1	1	0	0	0	0	1	1	1	1	0	1	0	0	4	1	1	1	0	0	1	0	0
345	37	3	4	3	1	0	0	1	0	1	3	1	1	1	1	0	0	0	0	1	1	0	1	0	1	0	1	2	1	0	1	0	0	1	0	0
346	20	4	8	3	1	0	0	0	0	1	6	*	*	*	*	*	*	*	*	2	0	0	1	0	0	0	0	3	1	0	0	0	0	1	0	0
347	16	7	1	5	1	0	0	0	0	2	*	*	*	*	*	*	*	*	*	*	*	*	*	*	*	*	*	*	*	*	*	*	*	*	*	*
348	20	2	3	3	1	0	0	1	0	1	1	1	1	1	1	1	1	1	1	1	0	1	1	0	1	0	1	5	2	0	1	0	1	0	0	0
349	20	2	2	3	1	0	0	0	0	2	*	*	*	*	*	*	*	*	*	*	*	*	*	*	*	*	*	*	*	*	*	*	*	*	*	*
350	44	3	2	3	1	0	0	0	0	1	3	0	1	1	1	0	0	0	1	1	0	0	0	0	1	0	0	2	5	0	1	0	1	1	0	0
351	35	1	5	3	0	0	0	0	1	2	*	*	*	*	*	*	*	*	*	*	*	*	*	*	*	*	*	*	*	*	*	*	*	*	*	*
352	44	1	7	3	1	0	0	1	0	1	3	0	0	1	1	1	0	1	0	2	1	0	0	0	0	0	0	3	5	1	1	0	0	1	0	0
353	44	4	4	3	1	0	0	1	0	1	1	1	0	1	0	1	0	1	0	1	1	1	0	0	0	0	0	2	2	1	0	0	0	1	0	0
354	44	2	2	3	1	0	0	0	0	2	*	*	*	*	*	*	*	*	*	*	*	*	*	*	*	*	*	*	*	*	*	*	*	*	*	*
355	44	2	2	3	1	0	0	0	0	2	*	*	*	*	*	*	*	*	*	*	*	*	*	*	*	*	*	*	*	*	*	*	*	*	*	*
356	21	3	2	3	1	0	0	0	0	1	1	0	0	0	1	0	0	0	0	1	1	1	1	0	0	0	0	3	1	0	1	0	0	0	0	0
357	4	1	3	3	1	0	0	0	0	1	2	1	0	1	0	0	0	1	0	1	1	1	1	1	0	0	0	3	1	1	1	1	0	0	0	0
358	18	3	2	3	1	0	0	0	0	1	1	0	1	1	1	0	0	0	0	1	1	0	1	0	0	0	1	2	2	1	1	0	0	1	0	0
359	21	1	4	3	0	0	0	0	1	1	1	1	1	1	1	0	0	0	0	1	1	1	1	0	1	0	0	2	1	0	0	0	0	0	0	1
360	2	1	3	3	1	0	0	1	0	1	2	0	1	1	1	0	0	1	0	1	0	0	1	0	0	0	1	3	3	1	1	0	1	0	0	0
361	14	2	3	4	1	0	0	0	0	1	1	0	0	1	0	0	0	0	0	1	1	1	0	0	0	0	0	4	5	1	1	0	0	0	0	0
362	6	2	2	1	1	1	0	1	0	1	1	1	0	1	1	0	0	1	0	1	0	0	1	0	0	0	0	3	1	1	0	0	0	0	0	0
363	44	4	5	3	1	0	0	0	0	2	*	*	*	*	*	*	*	*	*	*	*	*	*	*	*	*	*	*	*	*	*	*	*	*	*	*
364	37	2	3	5	0	0	0	0	1	1	6	1	1	1	1	1	1	1	0	1	0	0	0	0	0	0	1	5	5	0	0	0	0	0	0	1
365	44	6	3	3	1	0	0	0	0	1	2	0	0	1	0	0	0	1	0	1	1	0	1	0	0	0	0	3	1	1	0	0	0	0	0	0
366	4	2	6	5	1	0	0	1	0	1	1	1	0	1	1	0	0	0	0	1	1	0	1	0	1	0	0	3	2	0	1	0	1	1	0	0
367	19	1	2	3	1	0	0	0	0	1	2	*	*	*	*	*	*	*	*	1	1	0	1	0	0	0	0	3	5	0	1	0	0	0	0	0
369	44	4	1	3	1	0	0	1	0	2	*	*	*	*	*	*	*	*	*	*	*	*	*	*	*	*	*	*	*	*	*	*	*	*	*	*
370	44	7	1	4	1	0	0	0	0	2	*	*	*	*	*	*	*	*	*	*	*	*	*	*	*	*	*	*	*	*	*	*	*	*	*	*
371	5	1	2	4	0	0	0	0	1	2	*	*	*	*	*	*	*	*	*	*	*	*	*	*	*	*	*	*	*	*	*	*	*	*	*	*
372	44	4	3	3	1	0	0	0	0	2	*	*	*	*	*	*	*	*	*	*	*	*	*	*	*	*	*	*	*	*	*	*	*	*	*	*
373	7	2	2	3	1	0	0	0	0	2	*	*	*	*	*	*	*	*	*	*	*	*	*	*	*	*	*	*	*	*	*	*	*	*	*	*
374	44	1	3	3	0	0	0	0	1	2	*	*	*	*	*	*	*	*	*	*	*	*	*	*	*	*	*	*	*	*	*	*	*	*	*	*
375	27	6	1	4	1	0	0	0	0	2	*	*	*	*	*	*	*	*	*	*	*	*	*	*	*	*	*	*	*	*	*	*	*	*	*	*
376	36	1	4	3	0	0	0	0	1	2	*	*	*	*	*	*	*	*	*	*	*	*	*	*	*	*	*	*	*	*	*	*	*	*	*	*
377	6	3	4	3	1	0	0	1	0	1	1	0	0	1	0	1	0	0	0	1	1	0	0	0	0	0	0	4	2	0	1	0	0	0	0	0
378	31	1	2	3	0	0	0	0	1	1	4	1	1	1	1	0	0	0	1	2	1	0	0	0	0	0	0	2	1	0	1	0	0	0	0	0
379	44	7	3	3	1	0	0	0	0	1	1	0	0	1	0	0	0	1	1	3	0	0	0	1	0	0	0	2	1	0	1	0	0	1	0	0
380	5	1	2	3	1	0	0	0	0	1	1	0	0	1	1	0	0	0	0	1	0	1	1	0	0	0	0	3	1	0	1	0	0	0	0	0
381	3	1	5	3	1	0	0	0	0	1	4	1	1	1	1	0	0	1	0	1	1	1	1	0	0	0	0	3	1	1	0	0	0	0	0	0
382	15	2	2	3	1	0	0	1	0	1	1	*	*	*	*	*	*	*	*	2	1	1	0	0	0	0	0	3	2	1	1	0	0	0	0	0
383	29	2	3	3	1	0	0	1	0	1	1	1	1	1	0	0	0	1	0	1	0	0	1	0	0	0	0	4	3	1	1	0	0	1	0	0
384	34	6	2	4	1	0	0	0	0	1	2	1	1	1	0	0	1	1	0	2	0	0	0	0	1	0	0	3	2	0	0	0	0	1	0	0
385	37	7	2	3	1	0	0	1	0	1	4	1	0	0	0	0	0	1	0	2	0	1	0	0	0	0	0	2	1	1	0	0	0	1	0	0
386	32	2	2	4	0	0	0	0	1	1	1	1	0	0	0	0	0	0	0	1	0	0	1	0	0	0	0	3	2	0	0	0	0	1	0	0
387	15	6	2	3	1	0	0	0	0	1	2	0	1	1	0	0	0	0	0	3	1	1	1	0	0	0	0	2	3	1	1	0	0	1	0	0
388	44	1	1	1	1	0	0	0	0	1	5	0	1	1	1	1	0	1	0	3	0	0	0	0	1	0	0	4	3	1	0	0	1	0	0	0
389	44	1	1	3	1	0	0	0	0	1	1	1	1	1	1	1	1	1	0	2	1	0	0	0	0	0	0	3	3	0	1	0	0	1	0	0
390	19	1	4	3	1	0	0	0	0	2	*	*	*	*	*	*	*	*	*	*	*	*	*	*	*	*	*	*	*	*	*	*	*	*	*	*
391	44	3	3	3	1	0	0	0	0	2	*	*	*	*	*	*	*	*	*	*	*	*	*	*	*	*	*	*	*	*	*	*	*	*	*	*
392	10	2	2	3	1	0	0	1	0	1	2	1	0	1	1	0	0	1	0	1	1	0	1	0	1	0	0	2	1	1	1	0	0	1	0	0
393	44	6	3	3	1	0	0	1	0	1	1	1	0	0	0	0	0	0	0	2	1	0	0	0	0	0	0	3	3	1	1	0	0	1	0	0
394	15	2	2	3	1	0	0	0	0	1	1	0	0	1	0	0	0	0	0	1	1	1	1	0	0	0	0	2	1	1	1	0	0	1	0	0
395	35	3	4	3	1	0	0	0	0	1	3	1	1	1	1	1	0	0	0	2	1	1	1	0	1	0	0	2	2	1	1	0	0	1	0	0
396	47	6	5	3	1	0	0	1	0	1	2	*	*	*	*	*	*	*	*	2	0	1	0	0	0	0	1	3	2	0	1	0	0	1	1	0
397	50	7	1	3	1	0	0	1	0	1	1	1	0	0	0	0	0	0	0	1	1	0	0	0	0	0	0	3	2	1	1	0	0	0	0	0
398	9	8	8	3	1	0	0	1	0	1	2	*	*	*	*	*	*	*	*	2	1	1	1	1	1	0	0	3	5	1	1	0	0	1	0	0
399	44	2	2	3	1	0	0	0	0	1	2	0	0	1	1	1	0	1	1	1	1	0	0	0	0	0	0	3	2	0	1	0	0	1	0	0
400	16	1	3	3	0	0	0	0	1	1	2	1	1	0	1	0	0	0	1	1	1	0	1	0	0	0	0	2	1	0	1	0	0	0	0	0
401	25	2	4	3	1	0	0	0	0	1	1	1	0	1	0	1	0	0	0	1	1	1	1	0	1	0	0	2	5	1	1	0	0	1	0	0
402	26	2	4	3	1	0	0	1	0	1	6	1	1	1	1	0	0	1	0	1	1	1	1	0	1	0	1	3	1	1	1	0	0	1	0	0
403	44	1	2	4	1	0	0	0	0	1	1	*	*	*	*	*	*	*	*	1	1	0	1	0	0	0	0	3	1	0	1	0	0	0	0	0
404	2	1	2	3	1	0	0	1	0	1	2	1	1	1	1	0	0	0	1	2	1	1	1	0	1	0	0	1	1	1	1	0	0	0	0	0
405	11	3	2	3	1	0	0	0	0	1	2	0	0	1	1	0	1	0	0	2	0	1	1	0	0	0	0	2	1	0	1	0	0	1	0	0
406	44	2	2	4	1	0	0	0	0	2	*	*	*	*	*	*	*	*	*	*	*	*	*	*	*	*	*	*	*	*	*	*	*	*	*	*
407	45	7	5	5	1	0	0	0	0	1	5	1	1	1	1	0	0	1	0	3	0	1	1	0	0	1	0	3	2	0	0	0	0	1	0	0
408	36	5	2	2	1	0	0	0	0	1	3	1	1	1	1	1	0	1	0	1	1	0	1	1	1	0	0	2	5	1	1	0	0	1	0	0
409	44	1	3	3	0	0	0	0	1	2	*	*	*	*	*	*	*	*	*	*	*	*	*	*	*	*	*	*	*	*	*	*	*	*	*	*
410	44	3	2	3	1	0	0	1	0	1	1	*	*	*	*	*	*	*	*	2	0	0	1	0	0	0	0	2	1	0	1	0	1	1	0	0
411	44	5	3	3	1	0	1	1	0	1	3	0	0	1	1	0	0	1	1	1	1	0	0	0	0	0	0	1	2	1	0	0	1	1	0	0
412	29	7	3	3	1	0	0	0	0	1	1	*	*	*	*	*	*	*	*	1	0	0	0	0	1	0	0	3	3	0	1	0	0	1	0	0
413	39	4	2	3	1	0	0	1	0	1	3	1	1	1	1	0	0	0	0	1	0	0	1	0	0	0	0	2	1	1	1	0	0	1	0	0
414	14	1	3	3	1	0	0	1	0	2	*	*	*	*	*	*	*	*	*	*	*	*	*	*	*	*	*	*	*	*	*	*	*	*	*	*
415	3	3	4	2	1	0	0	0	0	1	1	*	*	*	*	*	*	*	*	1	1	1	1	0	0	0	0	3	2	0	1	0	0	1	0	0
416	15	2	4	3	1	0	0	1	0	1	1	1	1	0	1	0	0	1	0	1	0	0	1	0	1	0	0	4	1	1	1	0	0	1	0	0
418	44	4	6	3	1	0	0	0	0	1	2	0	0	0	0	0	0	1	0	3	1	0	1	0	0	0	0	1	2	0	0	0	0	1	0	0
419	5	2	5	4	0	0	0	0	1	2	*	*	*	*	*	*	*	*	*	*	*	*	*	*	*	*	*	*	*	*	*	*	*	*	*	*
420	46	1	1	3	1	1	0	0	0	1	2	1	1	1	1	1	0	1	0	1	1	0	1	1	0	0	0	3	2	0	1	0	0	1	0	0
421	44	2	3	2	1	0	0	0	0	1	2	1	0	0	0	0	1	0	0	2	0	1	1	0	0	0	0	3	2	1	1	0	1	0	0	0
422	1	3	4	4	1	0	0	0	0	1	1	0	1	1	1	1	0	0	0	1	1	0	1	1	1	0	0	3	1	0	0	0	0	1	0	0
423	32	1	2	4	1	0	0	1	0	1	1	1	1	0	1	0	1	0	0	1	0	1	1	0	1	0	0	2	2	1	1	0	0	1	0	0
424	44	3	3	2	1	0	0	0	0	1	2	0	0	0	0	0	0	0	1	2	1	0	0	0	1	1	0	2	1	1	0	0	1	1	0	0
425	11	4	2	3	1	0	0	1	0	2	*	*	*	*	*	*	*	*	*	*	*	*	*	*	*	*	*	*	*	*	*	*	*	*	*	*
426	16	1	5	3	1	0	0	0	0	1	3	1	1	1	1	0	0	1	0	1	0	0	0	0	1	0	0	3	2	0	1	0	1	0	0	0
427	44	1	5	3	1	0	0	0	0	1	2	*	*	*	*	*	*	*	*	2	0	0	1	0	0	0	0	3	2	0	1	0	0	1	0	0
428	44	1	3	4	1	0	0	0	0	1	1	1	0	1	0	0	0	0	0	1	1	0	0	1	0	0	0	2	2	0	1	0	0	1	0	0
429	37	2	2	3	1	0	0	1	0	1	1	*	*	*	*	*	*	*	*	1	1	0	1	0	0	0	0	1	1	0	1	0	0	0	0	0
430	15	2	2	3	1	0	0	0	0	1	3	*	*	*	*	*	*	*	*	1	1	1	1	0	0	0	0	3	2	0	1	0	1	1	0	0
431	10	1	4	3	0	0	0	1	0	1	5	1	1	1	1	1	0	1	0	3	1	1	0	0	0	0	0	3	2	1	1	0	0	0	0	0
432	14	5	5	3	1	0	0	1	0	1	2	0	1	1	1	0	0	1	0	2	0	0	0	0	0	0	1	2	3	1	1	0	0	0	0	0
433	21	3	3	3	1	0	0	0	0	1	2	*	*	*	*	*	*	*	*	2	0	1	1	0	0	0	0	3	1	1	1	1	0	0	0	0
434	44	2	3	3	1	0	0	0	0	1	4	1	1	1	1	0	0	1	0	1	1	1	1	0	1	1	0	2	2	0	1	0	0	0	0	0
435	16	1	3	3	1	0	0	1	0	1	6	*	*	*	*	*	*	*	*	2	0	1	1	0	0	0	0	2	1	1	0	1	0	0	0	0
437	1	2	2	4	1	0	0	0	0	2	*	*	*	*	*	*	*	*	*	*	*	*	*	*	*	*	*	*	*	*	*	*	*	*	*	*
438	45	7	1	3	1	1	0	1	0	1	3	1	1	0	0	0	0	0	0	1	1	1	0	0	0	0	0	3	2	1	1	0	0	0	0	0
439	35	2	3	3	1	0	0	1	0	1	1	1	0	0	1	0	0	0	1	1	0	0	1	0	0	0	0	3	2	1	1	0	0	1	0	0
440	44	5	4	3	1	0	0	0	0	1	2	*	*	*	*	*	*	*	*	1	1	0	1	1	0	0	0	2	2	1	1	0	0	1	0	0
441	25	2	3	3	1	0	1	1	0	1	2	1	1	1	1	0	0	1	0	1	1	1	1	0	1	0	0	3	2	1	1	1	0	0	0	0
442	44	3	8	3	1	0	0	0	0	1	2	0	1	1	1	0	0	0	0	1	0	0	1	1	1	0	0	3	2	0	1	0	0	1	0	0
443	44	3	3	3	1	0	0	1	0	1	2	*	*	*	*	*	*	*	*	1	1	1	0	0	0	0	0	3	1	1	1	0	0	1	0	0
444	45	1	5	3	1	0	0	0	0	1	5	1	1	1	1	1	0	1	0	1	0	0	1	0	0	0	0	3	1	0	0	0	0	1	0	0
445	19	1	2	3	1	0	0	1	0	1	2	1	0	1	1	0	0	0	0	2	1	0	1	1	0	0	0	1	2	1	1	0	0	1	0	0
446	29	1	1	3	0	0	0	0	1	2	*	*	*	*	*	*	*	*	*	*	*	*	*	*	*	*	*	*	*	*	*	*	*	*	*	*
447	37	1	2	3	1	0	0	1	0	1	4	1	1	1	1	1	0	0	1	1	1	1	1	0	0	0	0	2	2	1	1	0	1	0	0	0
448	10	2	4	3	1	0	0	1	0	1	2	1	0	1	1	0	0	1	0	1	1	1	1	0	0	1	1	2	2	1	1	0	0	1	0	0
449	44	5	5	3	1	0	0	0	0	2	*	*	*	*	*	*	*	*	*	*	*	*	*	*	*	*	*	*	*	*	*	*	*	*	*	*
450	44	2	2	3	1	0	0	1	0	1	1	0	0	0	0	0	0	1	0	1	1	1	1	0	0	0	1	3	5	1	1	0	0	0	0	0
451	44	1	4	3	1	0	0	0	0	1	2	0	0	1	1	0	0	0	1	2	1	1	1	0	0	0	0	3	3	0	1	0	1	1	0	0
452	23	5	3	1	1	1	0	1	0	1	3	1	1	1	0	0	1	1	0	2	0	0	1	1	0	0	0	4	4	0	0	0	1	1	0	0
453	39	4	2	3	1	0	0	0	0	1	1	1	0	0	0	0	0	0	0	2	1	0	0	0	0	0	0	2	2	1	1	0	0	0	0	0
454	44	2	2	3	1	0	0	1	0	1	1	1	1	0	0	0	0	0	0	1	1	0	0	0	0	0	0	2	1	1	1	0	0	1	0	0
455	9	1	2	3	1	0	0	1	0	1	2	1	1	1	0	0	1	0	0	2	1	0	1	0	1	0	0	2	2	1	1	0	0	1	0	0
456	39	1	7	3	1	0	0	1	0	1	2	*	*	*	*	*	*	*	*	2	0	0	0	0	0	0	1	2	2	1	1	0	0	0	0	0
457	43	2	3	3	1	0	0	1	0	1	3	1	1	1	1	0	1	1	0	2	1	1	0	1	0	0	0	3	3	1	1	0	1	0	0	0
458	54	2	5	3	1	0	0	0	0	1	5	1	1	1	1	1	1	1	0	2	1	0	1	0	0	0	0	2	2	0	0	0	0	1	0	0
459	10	5	4	4	1	0	1	0	0	1	1	1	1	1	0	0	0	1	0	1	1	0	1	0	0	0	0	3	2	0	1	0	0	1	0	0
460	44	8	3	4	1	0	0	1	0	1	6	*	*	*	*	*	*	*	*	4	*	*	*	*	*	*	*	*	2	0	1	0	0	0	0	0
461	47	1	4	3	1	1	0	0	0	1	1	1	0	1	0	0	0	1	0	2	1	0	1	1	0	0	0	2	1	0	1	0	0	0	0	0
462	25	3	6	3	1	0	0	1	0	1	2	1	0	1	0	0	0	1	0	2	1	1	0	0	0	0	1	2	2	0	1	0	1	1	0	0
463	44	1	2	2	1	0	0	0	0	1	1	0	0	1	0	1	0	1	0	2	0	0	1	1	1	0	0	3	2	0	1	0	1	0	0	0
464	44	6	5	3	1	1	0	0	0	1	3	0	0	1	1	1	0	1	0	2	1	1	0	1	1	0	0	3	1	0	1	0	0	1	0	0
465	35	2	3	3	1	0	0	1	0	1	3	1	0	1	1	0	0	1	0	1	1	1	1	0	0	0	0	1	1	1	1	0	0	1	0	0
466	16	2	4	3	1	0	0	0	0	1	6	1	1	1	1	1	0	1	0	1	1	1	1	1	1	0	0	3	1	1	1	1	0	0	0	0
467	50	1	1	4	0	0	0	0	1	2	*	*	*	*	*	*	*	*	*	*	*	*	*	*	*	*	*	*	*	*	*	*	*	*	*	*
469	50	1	4	3	1	0	0	1	0	1	4	1	1	1	1	0	0	0	1	3	1	1	1	0	1	1	0	2	3	1	1	0	0	1	0	0
470	20	1	5	3	1	0	0	1	0	1	3	1	1	1	0	0	0	1	0	1	1	0	1	0	0	0	0	4	1	0	1	0	0	1	0	0
471	37	7	2	3	1	0	0	0	0	1	1	*	*	*	*	*	*	*	*	4	*	*	*	*	*	*	*	*	2	0	0	0	0	1	0	0
472	37	6	2	3	1	0	0	0	0	1	2	1	1	1	1	1	0	1	0	1	1	0	1	0	1	1	1	3	1	1	1	0	1	0	0	0
473	18	2	2	3	1	0	0	1	0	1	3	*	*	*	*	*	*	*	*	2	1	1	1	1	0	0	0	3	3	0	0	0	1	1	0	0
474	36	4	5	3	1	0	0	1	0	1	3	1	0	0	0	0	0	1	0	2	0	1	0	0	0	0	0	2	2	0	0	0	0	1	0	0
475	44	3	2	3	1	0	0	0	0	1	1	1	0	1	0	0	0	1	0	1	1	0	0	0	0	1	1	4	1	0	0	0	0	0	0	1
476	44	2	2	3	1	0	0	0	0	1	1	0	0	0	0	0	0	1	0	1	1	0	0	0	0	0	0	2	2	0	1	0	0	1	0	0
477	44	1	3	4	1	0	0	0	0	1	1	*	*	*	*	*	*	*	*	1	0	0	1	0	0	0	0	3	2	0	1	0	0	1	0	0
478	46	2	4	3	1	0	0	0	0	2	*	*	*	*	*	*	*	*	*	*	*	*	*	*	*	*	*	*	*	*	*	*	*	*	*	*
479	44	3	2	3	1	0	0	0	0	1	2	*	*	*	*	*	*	*	*	2	1	0	0	0	0	0	1	2	3	0	1	0	1	1	0	0
480	3	3	5	3	1	0	0	0	0	1	3	*	*	*	*	*	*	*	*	2	1	1	0	0	0	0	0	4	5	1	1	0	0	0	0	0
481	36	2	3	2	1	0	0	0	0	1	1	*	*	*	*	*	*	*	*	3	1	0	0	0	0	0	0	2	2	1	0	0	0	0	0	0
482	44	2	1	2	1	0	0	0	0	1	2	1	1	1	1	0	1	1	1	2	0	0	0	0	0	0	1	1	4	0	0	0	1	0	1	0
483	5	2	1	3	1	0	0	0	0	2	*	*	*	*	*	*	*	*	*	*	*	*	*	*	*	*	*	*	*	*	*	*	*	*	*	*
484	5	7	2	3	1	0	0	1	0	2	*	*	*	*	*	*	*	*	*	*	*	*	*	*	*	*	*	*	*	*	*	*	*	*	*	*
485	32	5	3	3	1	0	0	1	0	2	*	*	*	*	*	*	*	*	*	*	*	*	*	*	*	*	*	*	*	*	*	*	*	*	*	*
486	44	7	2	3	1	0	1	1	0	1	2	*	*	*	*	*	*	*	*	2	0	0	0	0	0	0	1	3	2	1	0	1	1	0	0	0
487	36	4	3	3	1	0	0	0	0	1	3	1	1	0	1	0	0	0	0	2	0	1	1	0	1	0	0	2	2	0	0	0	0	1	0	0
488	25	2	2	3	1	0	0	1	0	1	1	1	0	0	1	0	0	0	0	1	1	1	0	0	0	0	0	2	2	1	1	0	0	0	0	0
489	35	1	2	3	1	0	0	0	0	1	2	1	0	1	0	0	0	0	0	1	1	1	1	0	0	0	0	3	2	1	1	0	0	1	0	0
490	7	2	3	2	1	0	0	0	0	1	4	1	1	1	1	0	0	0	0	1	0	1	1	0	0	0	0	2	1	0	0	0	1	1	0	0
491	44	1	2	3	1	0	0	1	0	1	1	1	1	1	1	1	0	1	1	2	1	1	1	0	0	0	0	3	2	1	1	1	0	0	0	0
492	44	1	3	3	1	0	0	1	0	1	1	*	*	*	*	*	*	*	*	3	0	0	0	0	0	0	1	3	1	1	0	0	1	1	0	0
493	48	6	2	2	1	0	0	0	0	1	3	1	1	1	1	0	0	0	0	2	1	0	0	0	0	0	0	3	2	0	0	0	0	1	0	0
494	36	4	1	3	1	0	0	0	0	1	2	1	0	1	1	1	0	0	0	2	1	0	1	1	0	0	0	2	2	1	0	0	0	1	0	0
495	47	5	3	3	1	0	0	0	0	1	1	*	*	*	*	*	*	*	*	1	0	1	0	0	0	0	0	3	1	1	1	0	0	1	0	0
496	44	1	1	3	1	0	0	1	0	1	5	1	1	1	0	0	0	0	0	2	1	0	1	0	1	0	1	3	5	0	0	0	0	0	0	1
497	10	4	2	3	1	0	0	0	0	1	1	*	*	*	*	*	*	*	*	2	1	0	0	0	0	0	1	3	5	0	1	0	1	1	0	0
498	10	5	4	4	1	0	0	1	0	1	1	1	1	0	0	0	0	0	0	1	0	0	1	0	0	0	0	2	2	0	1	0	0	0	0	0
499	45	2	3	3	1	0	0	0	0	1	1	1	1	0	0	0	0	0	0	1	1	0	1	0	0	0	0	4	2	0	1	0	0	1	0	0
500	47	2	3	3	1	0	0	0	0	1	1	1	1	1	1	0	0	0	0	2	1	0	0	0	0	0	0	3	1	0	0	1	0	0	0	0
501	32	4	2	3	1	0	0	0	0	1	1	1	0	0	1	0	0	1	0	3	1	0	0	0	0	0	0	2	3	0	1	0	1	1	0	0
502	27	1	3	3	1	0	0	0	0	1	1	*	*	*	*	*	*	*	*	1	1	0	1	0	0	0	0	3	1	0	1	0	0	1	0	0
503	44	4	5	3	1	0	0	0	0	1	1	*	*	*	*	*	*	*	*	1	1	1	1	0	0	0	0	4	5	0	1	0	1	1	0	0
504	44	7	5	3	1	0	0	1	0	1	1	*	*	*	*	*	*	*	*	4	*	*	*	*	*	*	*	*	5	1	0	0	1	1	0	0
505	44	3	3	3	1	0	0	1	0	1	3	0	1	1	1	1	0	1	0	1	1	1	1	1	1	0	0	3	3	1	0	0	1	1	0	0
506	44	1	1	3	1	0	0	0	0	1	4	1	1	1	1	1	1	1	1	2	1	0	1	0	0	0	0	3	3	0	0	0	0	1	0	0
507	11	5	4	3	1	0	0	1	0	1	6	*	*	*	*	*	*	*	*	4	*	*	*	*	*	*	*	*	3	0	0	0	0	0	0	1
508	32	2	2	4	1	0	0	0	0	2	*	*	*	*	*	*	*	*	*	*	*	*	*	*	*	*	*	*	*	*	*	*	*	*	*	*
509	37	2	3	3	0	0	0	1	0	1	1	1	0	0	1	0	0	0	0	1	0	0	1	0	0	0	0	3	1	0	1	0	0	0	0	0
510	44	7	5	3	1	0	0	0	0	1	3	0	0	1	0	0	0	0	0	2	0	0	1	0	0	0	0	2	2	1	1	0	0	1	0	0
511	46	3	3	3	1	0	0	1	0	1	1	0	1	0	1	0	1	1	0	1	1	0	1	0	1	0	1	3	2	0	1	0	1	1	0	0
512	21	2	6	3	1	1	0	0	0	1	1	0	1	1	1	0	1	0	0	1	1	0	1	0	0	0	0	2	1	0	1	0	0	1	0	0
513	37	1	2	4	1	0	0	0	0	1	1	1	1	1	1	0	0	0	1	1	1	0	1	1	0	0	0	2	1	0	0	0	0	1	0	0
514	36	3	4	3	1	1	1	1	0	1	3	1	1	1	1	0	1	1	0	1	1	1	1	1	1	0	1	3	5	1	1	0	0	1	0	0
515	44	1	3	3	1	0	0	1	0	1	2	0	0	1	0	0	0	1	0	2	1	0	0	0	0	0	0	3	2	1	1	0	0	0	0	0
516	44	4	2	3	1	0	0	1	0	1	1	*	*	*	*	*	*	*	*	1	0	1	1	0	0	0	0	3	1	1	1	0	0	0	0	0
517	28	2	5	3	0	0	0	0	1	1	1	1	1	1	0	0	0	1	0	1	0	1	1	0	0	0	0	2	1	0	1	1	0	0	0	0
518	44	1	1	3	1	0	0	0	0	1	1	1	0	1	1	0	0	0	0	1	1	0	1	0	0	0	0	2	1	0	1	0	1	0	0	0
519	14	2	2	4	1	0	0	0	0	1	1	*	*	*	*	*	*	*	*	1	0	0	1	0	0	1	1	3	1	0	1	0	0	0	0	0
520	35	7	5	4	1	0	0	0	0	1	5	1	1	1	1	0	0	0	0	1	1	0	1	0	0	0	0	3	1	0	0	0	0	1	0	0
521	5	3	4	3	1	0	0	0	0	1	1	*	*	*	*	*	*	*	*	2	1	0	0	0	0	0	1	2	2	1	0	0	0	0	0	0
522	46	3	6	3	1	1	0	1	0	1	6	0	1	1	1	0	0	0	1	1	1	1	1	0	0	0	0	2	1	0	1	0	1	1	0	0
523	33	1	4	2	1	0	0	0	0	1	1	0	1	1	0	1	0	0	0	2	1	0	1	0	0	0	0	3	2	0	1	0	1	1	0	0
524	3	2	5	3	1	1	0	1	0	1	2	1	1	1	1	1	0	0	0	1	1	1	1	0	0	0	0	2	2	0	1	0	1	0	0	0
525	44	1	4	3	1	0	0	1	0	2	*	*	*	*	*	*	*	*	*	*	*	*	*	*	*	*	*	*	*	*	*	*	*	*	*	*
526	44	2	2	4	1	0	0	0	0	2	*	*	*	*	*	*	*	*	*	*	*	*	*	*	*	*	*	*	*	*	*	*	*	*	*	*
527	47	2	7	3	0	1	1	1	0	1	4	1	1	1	1	1	0	0	1	1	1	1	1	0	1	1	0	3	2	1	1	1	0	0	0	0
528	11	1	2	3	1	0	0	1	0	1	1	0	0	1	1	0	0	0	0	2	0	0	0	0	1	0	0	2	1	1	0	0	0	0	0	0
529	33	2	6	3	1	0	0	0	0	1	1	*	*	*	*	*	*	*	*	1	1	1	1	0	0	0	1	2	1	0	1	0	1	1	0	0
530	44	5	3	3	0	0	0	0	1	2	*	*	*	*	*	*	*	*	*	*	*	*	*	*	*	*	*	*	*	*	*	*	*	*	*	*
531	44	1	4	3	1	0	0	0	0	1	1	0	1	0	0	0	0	1	0	1	0	0	1	0	0	0	0	3	2	0	1	0	0	0	0	0
532	14	1	3	3	1	0	0	0	0	1	1	0	0	1	1	1	0	1	0	1	1	1	1	1	1	0	0	3	2	0	1	0	0	1	0	0
533	44	1	3	3	1	0	0	1	0	1	2	*	*	*	*	*	*	*	*	1	1	1	1	0	1	0	0	3	2	1	1	0	0	0	0	0
534	44	5	3	3	0	0	0	1	0	1	1	*	*	*	*	*	*	*	*	2	1	0	1	0	0	0	1	3	3	1	1	0	1	0	0	0
535	10	3	3	5	1	0	0	1	0	1	1	1	1	0	1	0	0	1	0	1	1	1	1	0	0	0	0	2	2	0	1	0	1	1	0	0
536	45	4	3	3	1	0	0	0	0	1	2	0	0	0	0	0	0	1	0	1	1	1	0	0	1	0	0	3	5	0	1	0	1	1	0	0
537	37	7	2	3	1	0	0	0	0	1	1	1	0	0	1	0	0	0	0	1	1	0	0	1	1	0	0	3	1	0	1	0	0	1	0	0
538	19	7	3	3	1	0	0	1	0	1	2	1	1	1	1	1	0	1	0	2	1	1	1	1	0	0	1	2	2	1	1	0	0	1	0	0
539	44	1	1	3	1	0	0	1	0	1	1	*	*	*	*	*	*	*	*	1	0	0	0	1	0	0	0	3	2	1	1	0	0	0	0	0
540	47	2	2	3	1	0	0	0	0	1	1	1	0	1	1	0	0	0	0	1	0	1	1	0	0	0	0	4	1	1	1	0	0	1	0	0
542	50	2	5	3	1	0	0	1	0	1	6	1	1	1	1	0	0	1	0	1	0	1	1	1	1	0	0	3	5	1	1	0	0	1	0	0
543	44	1	3	3	1	0	0	0	0	2	*	*	*	*	*	*	*	*	*	*	*	*	*	*	*	*	*	*	*	*	*	*	*	*	*	*
544	47	4	2	3	0	0	0	0	1	1	3	0	0	0	0	0	0	0	1	2	0	0	0	0	0	0	1	2	1	0	0	0	0	0	0	1
545	44	6	3	3	0	0	0	0	1	1	1	0	0	1	0	0	0	1	0	2	0	0	1	0	0	0	0	2	3	0	0	0	0	1	0	0
546	37	2	2	3	1	0	0	0	0	1	4	1	0	1	1	0	0	1	0	2	1	1	1	0	1	1	0	2	2	0	1	0	0	1	0	0
547	11	2	3	3	1	0	0	1	0	2	*	*	*	*	*	*	*	*	*	*	*	*	*	*	*	*	*	*	*	*	*	*	*	*	*	*
548	32	2	3	3	0	0	0	1	0	1	1	*	*	*	*	*	*	*	*	2	0	1	1	0	0	0	0	2	3	1	1	0	1	0	0	0
549	44	4	4	4	1	0	0	1	0	1	1	0	0	0	0	0	0	1	0	3	0	0	0	0	0	0	1	4	1	1	0	0	0	0	0	0
550	44	2	4	3	1	0	0	1	0	1	3	*	*	*	*	*	*	*	*	1	1	1	1	0	0	0	0	3	2	1	1	0	0	0	0	0
551	11	2	7	3	1	0	0	1	0	2	*	*	*	*	*	*	*	*	*	*	*	*	*	*	*	*	*	*	*	*	*	*	*	*	*	*
552	9	2	2	3	0	0	0	0	1	1	2	1	1	1	1	1	0	1	1	1	1	1	1	0	1	0	0	2	1	0	1	0	1	0	0	0
553	39	1	3	3	1	0	0	0	0	1	3	0	1	1	0	0	0	1	0	3	1	0	0	0	0	0	0	3	3	0	1	0	0	1	0	0
554	34	7	4	4	1	0	0	0	0	1	4	1	1	0	1	1	0	1	0	1	1	1	1	1	0	0	0	4	1	0	0	0	0	1	0	0
555	47	1	3	3	1	0	0	0	0	1	2	1	1	1	0	0	0	0	0	1	1	1	0	0	1	0	0	2	1	1	1	0	0	1	0	0
556	3	1	6	3	1	0	0	1	0	1	4	1	1	1	1	0	0	0	0	1	1	1	1	0	0	0	1	3	2	1	1	0	0	1	0	0
557	5	3	3	3	1	0	0	0	0	2	*	*	*	*	*	*	*	*	*	*	*	*	*	*	*	*	*	*	*	*	*	*	*	*	*	*
558	29	1	3	3	1	0	0	0	0	1	3	1	1	1	0	0	0	0	0	1	0	1	1	0	1	0	0	2	1	1	1	0	0	1	0	0
559	44	1	1	3	1	0	0	0	0	1	1	1	0	0	1	1	0	0	0	2	1	1	0	0	1	0	0	2	3	0	0	0	0	1	0	0
560	10	2	1	3	0	0	0	0	1	1	1	*	*	*	*	*	*	*	*	1	0	0	0	0	1	0	0	3	1	0	1	0	1	0	0	0
561	3	5	3	3	1	0	0	0	0	1	2	1	1	0	1	0	0	0	0	3	1	1	0	0	0	0	1	4	2	1	1	0	0	1	0	0
562	47	7	2	3	1	0	0	0	0	1	5	1	1	0	1	0	0	1	0	3	1	1	0	0	0	1	0	2	5	0	0	0	0	1	0	0
563	37	5	5	3	1	1	0	0	0	1	2	1	0	1	1	0	0	0	0	3	1	0	1	0	0	0	0	3	3	1	1	0	0	0	0	0
564	10	4	4	3	1	0	0	0	0	1	2	0	1	0	1	0	0	0	0	1	0	0	0	0	0	0	1	3	2	0	1	0	0	1	0	0
565	25	4	1	3	1	0	0	0	0	1	3	*	*	*	*	*	*	*	*	3	1	0	0	0	0	0	0	2	2	1	0	0	0	0	0	0
566	5	4	3	3	0	0	0	0	1	2	*	*	*	*	*	*	*	*	*	*	*	*	*	*	*	*	*	*	*	*	*	*	*	*	*	*
567	34	4	1	3	1	0	0	1	0	1	2	1	1	1	1	0	0	1	0	3	1	0	0	0	0	0	0	2	2	1	1	0	0	1	0	0
568	36	1	2	3	1	0	0	1	0	1	2	1	0	1	0	0	0	1	0	2	1	1	1	0	0	0	1	3	2	1	1	0	0	1	0	0
569	45	1	1	3	1	0	0	0	0	1	1	0	1	1	0	0	0	0	0	1	0	0	1	0	0	0	0	3	1	0	1	0	1	0	0	0
570	49	5	1	3	1	0	0	0	0	1	2	*	*	*	*	*	*	*	*	1	1	0	0	1	0	0	0	3	1	1	1	0	0	0	0	0
571	36	4	5	3	1	0	0	0	0	1	2	1	0	1	0	0	0	0	0	1	0	0	1	0	0	0	0	2	1	0	1	0	0	1	0	0
572	44	4	2	3	1	0	0	0	0	1	3	0	1	0	0	0	0	1	0	1	1	1	0	0	0	0	0	3	2	0	0	1	1	1	0	0
573	50	2	2	4	1	0	0	1	0	1	6	*	*	*	*	*	*	*	*	1	1	1	1	0	0	0	1	3	5	0	1	0	0	0	0	0
574	44	4	2	3	1	0	0	0	0	2	*	*	*	*	*	*	*	*	*	*	*	*	*	*	*	*	*	*	*	*	*	*	*	*	*	*
575	44	3	5	3	1	0	0	1	0	1	1	*	*	*	*	*	*	*	*	1	1	0	1	0	0	0	0	3	2	1	1	0	0	1	0	0
576	14	4	3	3	1	0	0	1	0	2	*	*	*	*	*	*	*	*	*	*	*	*	*	*	*	*	*	*	*	*	*	*	*	*	*	*
577	44	3	4	4	1	0	0	1	0	1	6	1	1	1	0	0	0	0	0	1	1	1	1	0	0	0	1	3	2	0	1	0	0	1	0	0
578	44	2	3	3	1	0	0	1	0	1	1	0	0	1	0	0	0	1	0	1	0	1	1	1	0	0	0	4	3	1	1	0	1	0	0	0
579	44	4	2	2	0	0	0	0	1	1	2	0	0	1	0	0	0	1	0	3	0	0	0	0	0	0	1	5	3	1	0	0	0	0	0	0
580	16	2	3	3	1	0	0	0	0	1	2	0	1	1	0	0	0	1	0	3	0	0	1	0	0	0	0	2	2	1	1	1	0	0	0	0
581	37	4	3	2	1	0	0	0	0	1	1	0	1	0	0	0	0	1	0	1	1	1	0	0	1	0	1	3	3	0	1	0	1	0	0	0
582	10	2	4	3	1	0	0	0	0	1	1	1	1	0	0	0	0	0	0	1	0	1	1	0	0	0	1	3	1	1	1	0	0	0	0	0
583	10	2	2	3	1	0	0	0	0	1	2	1	0	1	1	0	0	0	0	3	0	0	0	0	0	0	1	3	5	1	1	0	0	1	0	0
584	44	3	5	3	1	0	0	1	0	1	2	0	0	0	1	0	0	1	0	1	0	1	0	0	0	0	0	1	3	1	1	0	1	0	0	0
585	44	3	7	3	1	0	0	0	0	1	2	0	0	1	1	1	0	1	0	1	0	0	1	0	0	0	0	3	2	1	0	0	1	1	0	0
586	18	2	3	4	1	0	0	0	0	1	1	1	0	1	1	0	0	1	0	1	1	1	1	0	0	0	0	3	1	0	1	0	0	0	0	0
587	44	7	5	3	0	0	0	0	1	1	3	0	1	1	1	1	1	1	0	1	1	0	1	1	1	1	0	2	1	0	1	1	1	0	0	0
588	7	3	4	3	1	0	0	1	0	1	2	0	0	0	1	0	0	0	1	2	1	1	1	0	0	0	0	3	2	0	1	0	0	1	0	0
589	47	3	2	3	0	1	0	0	0	1	2	1	1	1	0	0	0	0	1	2	1	1	1	1	0	1	0	1	2	0	0	1	0	0	0	0
590	14	2	3	3	1	0	0	0	0	2	*	*	*	*	*	*	*	*	*	*	*	*	*	*	*	*	*	*	*	*	*	*	*	*	*	*
591	44	2	2	3	1	0	0	0	0	1	1	0	0	0	0	0	0	1	0	2	1	0	0	0	0	0	0	3	3	0	0	0	0	1	0	0
592	20	3	4	3	1	0	0	0	0	1	1	*	*	*	*	*	*	*	*	1	1	1	1	0	0	0	0	3	2	0	1	0	1	0	0	0
593	21	1	5	3	0	0	0	0	1	1	5	1	1	1	1	1	0	1	0	1	1	1	1	0	0	0	0	3	1	1	1	0	0	0	0	0
594	35	2	3	5	0	0	0	0	1	2	*	*	*	*	*	*	*	*	*	*	*	*	*	*	*	*	*	*	*	*	*	*	*	*	*	*
595	44	1	2	3	1	0	1	0	0	1	1	0	0	0	0	0	0	1	0	1	0	1	1	0	0	0	0	2	1	0	1	0	1	1	0	0
596	37	4	5	3	1	0	0	0	0	1	3	1	1	0	1	0	0	0	0	1	0	0	0	0	0	0	1	3	1	0	1	0	0	1	0	0
597	44	4	3	2	0	0	0	1	0	1	1	1	1	1	1	1	0	1	0	1	1	0	1	0	0	0	0	1	2	1	1	0	1	0	0	0
598	10	1	5	3	1	1	1	0	0	1	3	1	0	1	1	0	1	0	0	2	1	0	1	0	0	0	0	3	2	0	0	0	0	0	0	1
599	15	7	3	3	0	0	0	1	0	1	1	1	1	0	0	0	0	0	0	1	1	1	1	0	0	0	0	3	2	1	1	0	0	1	0	0
600	13	4	1	3	1	0	0	0	0	1	2	*	*	*	*	*	*	*	*	1	1	1	0	0	0	0	0	3	2	0	1	0	0	1	0	0
601	44	5	4	3	1	0	0	1	0	1	2	*	*	*	*	*	*	*	*	1	1	0	1	0	0	0	0	2	2	1	0	0	0	0	0	0
602	44	1	1	3	1	0	0	0	0	1	1	0	0	1	0	1	0	1	0	2	1	0	0	0	0	0	0	1	2	0	1	1	0	1	0	0
603	18	5	5	3	1	0	0	1	0	1	6	*	*	*	*	*	*	*	*	2	1	0	0	0	1	0	0	2	1	0	1	0	0	1	0	0
604	14	3	3	3	1	0	0	1	0	1	1	*	*	*	*	*	*	*	*	1	1	1	0	1	0	0	0	3	1	1	1	0	0	0	0	0
605	5	8	1	4	1	0	0	0	0	1	1	0	0	1	0	1	0	0	0	3	0	0	1	0	0	0	0	3	2	0	0	0	0	1	0	0
606	50	1	1	3	1	0	0	0	0	2	*	*	*	*	*	*	*	*	*	*	*	*	*	*	*	*	*	*	*	*	*	*	*	*	*	*
607	44	4	5	3	1	0	0	1	0	1	1	*	*	*	*	*	*	*	*	4	*	*	*	*	*	*	*	*	5	1	1	0	0	1	0	0
608	6	3	3	3	1	0	0	1	0	1	1	1	0	1	1	0	0	1	0	1	1	0	0	0	0	0	1	3	5	1	1	0	0	1	0	0
609	44	1	2	3	0	0	0	0	1	2	*	*	*	*	*	*	*	*	*	*	*	*	*	*	*	*	*	*	*	*	*	*	*	*	*	*
610	44	4	4	3	0	0	0	0	1	1	1	0	0	1	0	0	0	1	0	1	0	0	0	0	0	0	1	2	2	0	0	0	0	0	0	1
611	36	1	3	3	1	1	0	0	0	1	1	1	0	1	0	1	0	0	0	2	1	1	0	1	1	0	0	3	2	1	1	0	0	0	0	0

## Sheet: Survey question
Question Number	Question content	Response format
1	City/Town
2	Number of pharmacies belong to the same cooperation
3	Number of prescription per month
4	The highest Englsih Level of Pharmacies
5	Knowledge of multilingual support resources (Multiple choice)	Translation devices or apps
		Written translated materials
		"Easy Japanese"
		Professional or trained interpreters
		Don't know
6	Ever received foreign patients
7	Number of foreign patients per year
8	Nationality of foreign patients (Multiple choice)	Brazil
		Vietnam
		China
		Philipines
		Korea
		Nepal
		English speaking
		Others
9	How often are fp accommpanied by someone to help them as an interpreter?
10	"Who accompanise foreign patients? " (Multiple choice)	Family member (adult)
		Family member (child)
		Co-worker
		Foreign friends
		Foreign friends
		Professional or trained interpreters
		Don't know
11	"Have youever been anxiety about the accuracy of ad hoc interpreters?"
12	"Foreign patients should be accomaniesed by someone for interpretation ?"
13	"The top three most frequency used communication resources?"	Somebody else accompanying foreign patients
		Translation devices or apps
		Translated materials
		Pharmacist's foreign language
		"Easy Japanese"
		Professional interpretation
		Never used
